# Calcium-driven regulation of voltage-sensing domains in BK channels

Yenisleidy Lorenzo-Ceballos<sup>1,2</sup>, Willy Carrasquel-Ursulaez<sup>2</sup>, Karen Castillo<sup>2</sup>, Osvaldo  
Alvarez<sup>2,3</sup> and Ramon Latorre<sup>2(\*)</sup>

*<sup>1</sup>Doctorado en Ciencias Mención Neurociencia, Facultad de Ciencias, Universidad de Valparaíso, Valparaíso, Chile; <sup>2</sup>Centro Interdisciplinario de Neurociencia de Valparaíso, Facultad de Ciencias, Universidad de Valparaíso, Valparaíso, Chile; <sup>3</sup>Departamento de Biología, Facultad de Ciencias, Universidad de Chile, Santiago, Chile.*

(\*) Correspondence and Requests for materials should be addressed to Ramon Latorre (ramon.latorre@uv.cl)

## 1 **Abstract**

2 Allosteric interplays between voltage-sensing domains (VSD), Ca<sup>2+</sup>-binding sites, and the  
3 pore domain govern the Ca<sup>2+</sup>- and voltage-activated K<sup>+</sup> (BK) channel opening. However,  
4 the functional relevance of the Ca<sup>2+</sup>- and voltage-sensing mechanisms crosstalk on BK  
5 channel gating is still debated. We examined the energetic interaction between Ca<sup>2+</sup>  
6 binding and VSD activation measuring and analyzing the effects of internal Ca<sup>2+</sup> on BK  
7 channels gating currents. Our results indicate that the Ca<sup>2+</sup> sensors occupancy has a  
8 strong impact on the VSD activation through a coordinated interaction mechanism in which  
9 Ca<sup>2+</sup> binding to a single  $\alpha$ -subunit affects all VSDs equally. Moreover, the two distinct high-  
10 affinity Ca<sup>2+</sup>-binding sites contained in the C-terminus domains, RCK1 and RCK2, appear  
11 to contribute equally to decrease the free energy necessary to activate the VSD. We  
12 conclude that voltage-dependent gating and pore opening in BK channels is modulated to  
13 a great extent by the interaction between Ca<sup>2+</sup> sensors and VSDs.

## 14 **Introduction**

15 Diverse cellular events involve calcium ions as a primary mediator in the signal  
16 transduction pathways triggering, among other signaling processes, Ca<sup>2+</sup>-activated  
17 conductances. Since the BK channels are regulated by cytosolic Ca<sup>2+</sup> and depolarizing  
18 voltages (Marty, 1981; Pallotta et al., 1981; Latorre et al., 1982), they are integrators of  
19 physiological stimuli including intracellular Ca<sup>2+</sup> elevation and membrane excitability. BK  
20 channels are modular proteins where each module accomplishes a specific channel  
21 function. Thus, different modules harbor voltage and Ca<sup>2+</sup> sensors that communicate with  
22 the channel gate allosterically (Cox et al., 1997; Horrigan and Aldrich, 1999, 2002;  
23 Horrigan et al., 1999; Rothberg and Magleby, 1999, 2000; Cui and Aldrich, 2000).  
24 Functional BK channels are formed by homotetramers of  $\alpha$ -subunits (Shen et al., 1994)  
25 each comprising a transmembrane voltage-sensing domain (VSD) and an intracellular  
26 Ca<sup>2+</sup>-sensing C-terminal domain (CTD) that can independently modulate the ion  
27 conduction gate in the pore domain (PD) (Latorre et al., 2017). The CTDs consist of two  
28 non-identical regulators of the conductance of K<sup>+</sup> domains (RCK1 and RCK2) arranged  
29 into a ring-like tetrameric structure dubbed the gating ring (Wu et al., 2010; Yuan et al.,  
30 2010, 2012; Hite et al., 2017; Tao et al., 2017). Each RCK domain contains distinct ligand-  
31 binding sites capable of detecting Ca<sup>2+</sup> in the micromolar range (Schreiber and Salkoff,  
32 1997; Bao et al., 2002; Xia et al., 2002).

33 In the absence of Ca<sup>2+</sup>, the activation of VSD decreases the free energy necessary to fully  
34 open the BK channels in an allosteric fashion (Horrigan and Aldrich, 1999; Horrigan et al.,  
35 1999). Under these experimental conditions, very positive membrane potentials are  
36 required to drive all voltage sensors to its activated conformation (Cui et al., 1997; Stefani  
37 et al., 1997; Horrigan et al., 1999; Contreras et al., 2012), ultimately leading to a significant  
38 activity of the BK channel. Hence, in cells like neurons, an appreciable open probability of

39 BK channels at physiologically relevant voltages necessarily involves the activation of  $\text{Ca}^{2+}$   
40 sensors on the gating ring. The allosteric interplays established between the functional  
41 and structural modules (VSD-PD, CTD-PD, and CTD-VSD) are key in enabling BK  
42 channels to operate over a dynamic wide-range of internal  $\text{Ca}^{2+}$  and voltage conditions by  
43 fine-tuning the channel's gating machinery. Therefore, understanding the structure-  
44 functional bases that underlie the  $\text{Ca}^{2+}$  and voltage activation mechanisms  
45 interrelationship becomes essential.

46 The voltage dependence of  $\text{Ca}^{2+}$ -dependent gating ring rearrangements (Miranda et al.,  
47 2013, 2018) and RCK1 site occupancy (Sweet and Cox, 2008; Savalli et al., 2012; Miranda  
48 et al., 2018) as well as the perturbation of VSD movements by  $\text{Ca}^{2+}$  binding (Savalli et al.,  
49 2012) support the idea that the energetic interaction between both specialized sensors  
50 may be crucial to favor BK channel activation. The physical CTD-VSD interface has been  
51 suggested to provide the structure capable of mediating the crosstalk between these  
52 sensory modules and their synergy in activating the pore domain (Yang et al., 2007; Sun  
53 et al., 2013; Tao et al., 2017; Zhang et al., 2017). However, the strength of the interaction  
54 between voltage and  $\text{Ca}^{2+}$  sensors and their relevance to BK channel activation is still an  
55 unresolved matter (Horrigan and Aldrich, 2002; Carrasquel-Ursulaez et al., 2015). Also,  
56 the functional role that plays each of the high-affinity  $\text{Ca}^{2+}$ -binding sites on the CTD-VSD  
57 allosteric interaction is an open question. The RCK1 and RCK2  $\text{Ca}^{2+}$ -binding sites have  
58 distinct functional properties conferred by their different molecular structures and relative  
59 positions within the gating ring (Wu et al., 2010; Yuan et al., 2010, 2012; Hite et al., 2017;  
60 Tao et al., 2017). Thus, the RCK sites differ in their  $\text{Ca}^{2+}$  binding affinities (Bao et al., 2002;  
61 Xia et al., 2002; Sweet and Cox, 2008), divalent cations selectivity (Oberhauser et al.,  
62 1988; Schreiber and Salkoff, 1997; Zeng et al., 2005; Zhou et al., 2012), voltage  
63 dependence (Sweet and Cox, 2008; Savalli et al., 2012; Miranda et al., 2018) and in their

64 contribution to allosteric gating mechanism (Yang et al., 2010, 2015). In particular, only  
65 the RCK1 site appears to be involved in communicating the  $\text{Ca}^{2+}$ -dependent  
66 conformational changes towards the membrane-spanning VSD (Savalli et al., 2012;  
67 Miranda et al., 2018). Recently, the *Aplysia* BK structure shows that the N-lobe of RCK1  
68 domain is in a non-covalent contact with the VSD and the S4-S5 linker being this RCK1-  
69 VSD interaction surface rearranged when comparing the liganded and  $\text{Ca}^{2+}$ -free  
70 structures (Hite et al., 2017; Tao et al., 2017). Actually, it has been hypothesized that any  
71  $\text{Ca}^{2+}$ -induced rearrangements of the gating ring should be ultimately transmitted to the  
72 pore domain via the VSD (Hite et al., 2017; Zhou et al., 2017). Thus, defining what extent  
73  $\text{Ca}^{2+}$  binding influences to VSD is crucial in determining how important is the crosstalk  
74 between sensors in decreasing the free energy necessary to open the BK channel.

75 Here, we examined the  $\text{Ca}^{2+}$ -dependence of the VSD activation estimating the allosteric  
76 coupling between  $\text{Ca}^{2+}$  and voltage sensors. By analyzing gating currents under  
77 unliganded and  $\text{Ca}^{2+}$ -saturated conditions, we found a strong energetic influence of the  
78  $\text{Ca}^{2+}$ -binding on the voltage sensors equilibrium in an independent manner of the channel  
79 opening. These findings point out that a major component in the synergistic  $\text{Ca}^{2+}$  and  
80 voltage activation of BK channels can reside on the sensory domains communication. We  
81 also found that the  $\text{Ca}^{2+}$ -dependent behavior of the voltage sensor activation is consistent  
82 with an CTD-VSD allosteric coupling that occurs through a concerted interaction scheme  
83 where each  $\text{Ca}^{2+}$ -bound to high-affinity sites affect equally all voltage sensors in the BK  
84 tetramer. Notably, we found that the two distinct RCK1 and RCK2  $\text{Ca}^{2+}$  sensors exert  
85 equivalent contributions on VSD via independent allosteric pathways.

## 86 Results

### 87 Allosteric coupling between Ca<sup>2+</sup>-binding and voltage sensor activation is strong.

88 We characterized the effects of Ca<sup>2+</sup>-binding on voltage sensor activation in BK channels  
89 by analyzing gating current measured on inside-out patches of *Xenopus laevis* oocyte  
90 membrane. Families of gating currents ( $I_G$ ) were evoked at different intracellular Ca<sup>2+</sup>  
91 concentrations ( $[Ca^{2+}]_i$ ) ranging from 0.1 to 100  $\mu$ M in K<sup>+</sup>-free solution (**Figure 1A**). For all  
92 experiments, first we measured  $I_G$  in the nominal absence of Ca<sup>2+</sup> (“zero Ca<sup>2+</sup>” condition),  
93 and then we perfused the internal side with solutions containing Ca<sup>2+</sup> at increasing  
94 concentrations. The amount of gating charge displaced ( $Q_C$ ) at each Ca<sup>2+</sup> concentration  
95 was obtained by fitting the initial part of the ON-gating current decay to a single exponential  
96 (fast ON-gating; see *Methods*) and integrating it. In this manner, we determine only the  
97 gating charge displaced before the BK channel opening.

98 The increase in internal Ca<sup>2+</sup> promotes a leftward shift of the  $Q_C$  versus voltage ( $Q_C(V)$ )  
99 curves (**Figure 1B,C**) which indicate that Ca<sup>2+</sup>-binding facilitates the activation of the  
100 voltage sensor being more prominent as binding sites occupancy increases. Revealing a  
101 strong energetic interaction between both sensors, a significant Ca<sup>2+</sup>-induced shift of  
102 voltage sensor activation occurs ( $\Delta V_H = -142.6 \pm 4.5$  mV) under Ca<sup>2+</sup>-saturated conditions  
103 for high-affinity binding sites (100  $\mu$ M). Such large shift means that Ca<sup>2+</sup>-binding to the  
104 RCK Ca<sup>2+</sup>-binding sites alters the VSD equilibrium promoting a decrease in the free energy  
105 ( $\Delta\Delta G_V^{Ca}$ ) that defines the voltage sensor resting-active (R-A) equilibrium by  $\sim 8$  kJ/mol  
106 ( $\Delta\Delta G_V^{Ca} = -7.98 \pm 0.27$  kJ/mol).

107 A visual inspection of the current records indicates that the kinetics of the ON-gating  
108 current is not much affected by the concentration of Ca<sup>2+</sup> present in the internal solution.

109 However, it is apparent that the OFF-gating current is dramatically modified becoming  
110 smaller in amplitude and with slower kinetics as the internal  $\text{Ca}^{2+}$  concentration is  
111 increased (**Figure 1A** and **Figure 1—figure supplement 1A**). At least two components  
112 can be resolved in the OFF gating current decay (**Figure 1—figure supplement 1B,C**),  
113 and the relative contribution of the slower component increases as internal  $\text{Ca}^{2+}$   
114 augmented reflecting an increase of the open probability of channel **Figure 1—figure**  
115 **supplement 1D,E**). This kinetic behavior recapitulates the effect describe on gating  
116 charge displacement as a function of the depolarizing pulse duration (Horrigan and  
117 Aldrich, 2002; Contreras et al., 2012; Carrasquel-Ursulaez et al., 2015), and confirm that  
118 this phenomenon is associated with the time course of channel opening revealing the  
119 allosteric interaction between voltage sensors and the pore gate (Horrigan and Aldrich,  
120 2002).

121  **$\text{Ca}^{2+}$  binding to single  $\alpha$ -subunit affects the R-A voltage sensor equilibrium of all**  
122 **four subunits equally.** Taking advantage of the dose-dependent effect of  $\text{Ca}^{2+}$  on voltage  
123 sensor activation we investigated the underlying mechanism of the  $\text{Ca}^{2+}$ -voltage sensors  
124 communication in the context of the well-established Horrigan-Aldrich (HA) allosteric  
125 gating model(Horrigan and Aldrich, 2002). Two different mechanisms were proposed by  
126 Horrigan and Aldrich for the interaction between the  $\text{Ca}^{2+}$ -binding sites and voltage  
127 sensors. The first mechanism supposes that  $\text{Ca}^{2+}$  binding to one  $\alpha$ -subunit affects the VSD  
128 in the same subunit only (Scheme I) (**Figure 2A**), while the second mechanism assumes  
129 that the  $\text{Ca}^{2+}$  binding affects the four VSD equally (Scheme II) (**Figure 2B**). It should be  
130 noted that the standard HA model makes two simplifying assumptions by considering a

131 single  $\text{Ca}^{2+}$ -binding site per  $\alpha$ -subunit and the Scheme I as the  $\text{Ca}^{2+}$  binding-VSD  
132 interaction mechanism underlying BK channel gating (Horrigan and Aldrich, 2002).

133 For a better comprehension, we simulated the normalized  $Q_C(V)$  curves over a wide  
134 range of  $\text{Ca}^{2+}$  concentrations (from 0 to 10 mM) for each  $\text{Ca}^{2+}$ -VSD interaction scheme  
135 (**Figure 2C,D**). Here we assume that the measurement of the fast gating currents captures  
136 the charge displaced by R-A transitions and exclude the charge associated with the  
137 transition between the activated states. This assumption is reasonable since the  $\text{Ca}^{2+}$ -  
138 binding rate constant estimated for BK is about  $10^8 \text{ M}^{-1}\text{s}^{-1}$  (Hou et al., 2016) implying that  
139 at 10  $\mu\text{M}$  internal  $\text{Ca}^{2+}$  (the highest non-saturating  $\text{Ca}^{2+}$  concentration tested) the time  
140 constant of the  $\text{Ca}^{2+}$  binding is 1 ms, while the VSD activates with a time constant of  $\sim 30$   
141  $\mu\text{s}$  at the higher voltage tested (see the *Supplementary Information* for details of the  
142 simulations). At extreme conditions of low (0.03 to 0.1  $\mu\text{M}$ ) and high ( $\geq 100 \mu\text{M}$ ) internal  
143  $\text{Ca}^{2+}$ , the VSD activation behaves in a mechanism-independent manner since all voltage  
144 sensors are in the same functional state (unliganded or saturated). However, the  
145 distinctive effects on  $Q_C(V)$  curves at intermediate  $\text{Ca}^{2+}$  concentrations (1-10  $\mu\text{M}$ ) provide  
146 useful signatures to distinguish between these two mechanisms. Scheme I predicts two  
147 functional states of the VSD depending on occupancy status of the  $\text{Ca}^{2+}$  site ( $\text{Ca}^{2+}$  bound  
148 and unbound) such that the  $Q_C(V)$  curve behavior is described by the fractional  
149 distribution of the unliganded and  $\text{Ca}^{2+}$ -saturated functional states like an all-or-none  
150 allosteric effect (**Figure 2C; Figure 2—figure supplement 1B** and Equation 4 in  
151 *Supplementary Information*). On the contrary, the  $\text{Ca}^{2+}$ -binding effect on the VSD  
152 activation according to the Scheme II is characterized by a five-component Boltzmann  
153 function (**Figure 2—figure supplement 1C** and Equation 6 in *Supplementary*  
154 *Information*). Each component represents a single functional state determined by the  
155 number of  $\text{Ca}^{2+}$  bound to the channel (from 0 to 4). In such case, the  $Q_C(V)$  curves



156 resulting from a distribution of functional states behaves as an equivalent single  
157 Boltzmann leftward shifted by an incremental allosteric effect (from  $E$  to  $E^4$ ) as the  
158 number of  $\text{Ca}^{2+}$  bound to the channel increases (**Figure 2D**).

159 To elucidate the mechanism by which  $\text{Ca}^{2+}$  and voltage sensors interact, we performed  
160 fits of the  $Q_C(V)$  data using the two different models represented in the Scheme I and  
161 Scheme II (**Figure 3A,B**). The allosteric factor  $E$  that accounts for the coupling between  
162 the  $\text{Ca}^{2+}$ -binding sites and the voltage sensors was constrained to values calculated from  
163 the experimental data of the  $Q_C(V)$  shift at the  $\text{Ca}^{2+}$  saturating conditions (100  $\mu\text{M}$ ) in  
164 relation to the same curve in the absence of  $\text{Ca}^{2+}$ . The  $z_J$ ,  $J_0$  and  $K_D$  parameters obtained  
165 during the fitting procedure of each model are very similar (**Figure 3C**). The fitted values  
166 of the affinity constant ( $K_D = 3 - 5 \mu\text{M}$ ) agree with previous reports (Cox et al., 1997;  
167 Horrigan and Aldrich, 2002) although slightly smaller than those estimated on the closed  
168 conformation of the channel ( $K_D = 11 \mu\text{M}$ ). However, we found that the fit with the Scheme  
169 II to the  $Q_C(V)$  curves (**Figure 3B**) is better than the fit to the data using Scheme I (**Figure**  
170 **3A**) as indicated by the Akaike model selection criteria (AIC) (Akaike, 1974). Moreover,  
171 Model II generates a  $V_H$ - $\log[\text{Ca}^{2+}]$  curve (solid line) that accounts for the dose-response  
172  $V_H$ - $\log[\text{Ca}^{2+}]$  experimental data reasonable well (**Figure 3D**). Also, the behavior of  
173  $Q_C(V)$  curves at intermediate  $\text{Ca}^{2+}$  concentrations (1-10  $\mu\text{M}$ ) is qualitatively consistent  
174 with the phenotype exhibit by the  $\text{Ca}^{2+}$ -VSD scheme II (**Figure 2D and Figure 3B**). Thus,  
175 the experimental dose-dependent effect of  $\text{Ca}^{2+}$  on voltage sensor activation reveals that  
176  $\text{Ca}^{2+}$ -binding to a single  $\alpha$ -subunit of BK channels increases  $E$ -fold the equilibrium  
177 constant  $J$  that defines the equilibrium between resting and active conformations of the  
178 voltage sensors in all four subunits.

179 **High-affinity Ca<sup>2+</sup>-binding sites in RCK1 and RCK2 domains contribute equally to**  
180 **the allosteric coupling between Ca<sup>2+</sup> and voltage sensors.** Under physiological  
181 conditions, the RCK1 and RCK2 high-affinity Ca<sup>2+</sup>-binding sites are responsible by all  
182 calcium sensitivity of the activation of BK channel (Schreiber and Salkoff, 1997; Bao et al.,  
183 2002, 2004; Xia et al., 2002). However, distinct physiological roles of the RCK1 Ca<sup>2+</sup>-  
184 sensor and Ca<sup>2+</sup> bowl may be based in their functionally and structurally distinctive  
185 properties (Zeng et al., 2005; Sweet and Cox, 2008; Yang et al., 2010; Savalli et al., 2012;  
186 Tao et al., 2017). Below, we asked what the energetic contribution to VSD equilibrium is  
187 of the two high-affinity Ca<sup>2+</sup>-binding sites contained in the RCK1 and RCK2 domains.

188 To elucidate the effect of each Ca<sup>2+</sup>-sensor on the VSD activation we used mutations that  
189 selectively and separately abolish the function of the two different RCK Ca<sup>2+</sup>-sites.  
190 Disruption of the RCK1 Ca<sup>2+</sup>-sensor by the double mutant D362A/D367A (Xia et al., 2002)  
191 reduces significantly (48%,  $\Delta V_H$  (D362A/D367A) =  $-74.9 \pm 4.7$  mV) the leftward shift of the  
192  $Q_C(V)$  curves at 100  $\mu$ M Ca<sup>2+</sup> compared with the wild-type (WT) BK channel (**Figure**  
193 **4A,C**). We also examined the effect of the mutant M513I (Bao et al., 2002) which have  
194 been shown to eliminate the Ca<sup>2+</sup> sensitivity derived from the RCK1 site (Bao et al., 2002,  
195 2004; Zhang et al., 2010). In this mutant, the 100  $\mu$ M Ca<sup>2+</sup>-induced shift in  $V_H$  of VSD  
196 activation curve is also considerably smaller relative to WT (about 54%,  $\Delta V_H$  (M513I) = -  
197  $65.4 \pm 2.6$  mV) (**Figure 5**). Therefore, both mutations affect the Ca<sup>2+</sup>-induced  
198 enhancement of activation of voltage sensor very similarly through the RCK1 site (**Figure**  
199 **5C**), although their mechanisms action could be quite different. The M513 residue appears  
200 to participate in the stabilization of the proper conformation RCK1 Ca<sup>2+</sup>-site whereas D367  
201 is a key residue in the coordination of Ca<sup>2+</sup> ion (Wu et al., 2010; Zhang et al., 2010; Tao  
202 et al., 2017). On the other hand, neutralization of the residues forming part of the Ca<sup>2+</sup>  
203 bowl (Schreiber and Salkoff, 1997) (5D5A mutant, see *Methods*) on the RCK2 domain

204 decreases the leftward shift of the  $Q_C(V)$  curve when  $\text{Ca}^{2+}$  is increased to 100  $\mu\text{M}$  by  
205 approximately 54% ( $\Delta V_H(5D5A) = -65.7 \pm 4.7$  mV) (**Figure 4B, D**). Surprisingly, the effect  
206 of  $\text{Ca}^{2+}$  binding on  $\Delta V_H$  from each high-affinity  $\text{Ca}^{2+}$  site is roughly half relative to WT  
207 channels with both intact sites (**Figure 4E**). Therefore, both high-affinity  $\text{Ca}^{2+}$ -binding sites  
208 contribute equally to decrease the free energy necessary to activate the VSD. Thus, the  
209 change of free energy of the resting-active equilibrium of the voltage sensor in response  
210 to  $\text{Ca}^{2+}$ -binding at RCK2 site is  $\sim -4$  kJ/mol ( $\Delta\Delta G_V^{Ca}(D362A/D367A) = -4.2 \pm 0.3$  kJ/mol and  
211  $\Delta\Delta G_V^{Ca}(M513I) = -3.6 \pm 0.5$  kJ/mol) (**Figure 4C** and **Figure 5C**). In the same way, the  
212 occupation of the RCK1  $\text{Ca}^{2+}$ -binding site decreases the free energy necessary to activate  
213 the VSD in  $-3.8 \pm 0.4$  kJ/mol ( $\Delta\Delta G_V^{Ca}(5D5A)$ ). Remarkably, these findings reveal an additive  
214 effect of  $\text{Ca}^{2+}$ -binding to the RCK1 and  $\text{Ca}^{2+}$  bowl sites on the VSD activation which  
215 suggest independent allosteric pathways through which they exert their modulation on the  
216 VSD.

217 Taking these results into account, we expanded the  $\text{Ca}^{2+}$ -VSD interaction model described  
218 by Scheme II considering the energetic contribution of the two kinds of  $\text{Ca}^{2+}$  sensors on  
219 the VSD per  $\alpha$ -subunit ( $E_{WT} = E_{S1} * E_{S2}$ ) (**Figure 2—figure supplement 1E**). As  
220 described in the above model fittings, the allosteric factors  $E$  of each one RCK1 and RCK2  
221 sites ( $E_{S1}$  and  $E_{S2}$ ) were constrained to values equivalent to the  $\text{Ca}^{2+}$ -induced energetic  
222 perturbations of the voltage sensor equilibrium for the 5D5A and D362A/D367A mutants,  
223 respectively. However, the inclusion of the two  $\text{Ca}^{2+}$  sensors in the  $\text{Ca}^{2+}$ -VSD interaction  
224 model does not produce better fits to  $Q_C(V, [\text{Ca}^{2+}])$  according to the AIC criteria (**Table**  
225 **1** and **Figure 3B**), the estimated  $K_D$  parameters for each  $\text{Ca}^{2+}$ -binding sites ( $K_{D1} = 15.6$   
226  $\mu\text{M}$  and  $K_{D2} = 1.9 \mu\text{M}$ ) by the experimental data fitting agrees very well with the apparent

227 Ca<sup>2+</sup> affinities previously reported in the literature (Bao et al., 2002; Xia et al., 2002; Sweet  
228 and Cox, 2008). Interestingly, modest positive cooperativity ( $G = 2.6$ ) between the two  
229 Ca<sup>2+</sup>-binding sites located in the same  $\alpha$ -subunit is required to achieve a good estimation  
230 of the  $K_D$  parameters (**Table 1**), where the Ca<sup>2+</sup> bowl site has an affinity for Ca<sup>2+</sup> about 8-  
231 fold greater than does the RCK1 Ca<sup>2+</sup>-sensor.

## 232 Discussion

233 Recent insights into a major interplay between voltage- and  $\text{Ca}^{2+}$ -sensing modules in the  
234 BK channel are supported by functional and structural studies (Yuan et al., 2010; Savalli  
235 et al., 2012; Miranda et al., 2013, 2016, 2018; Carrasquel-Ursulaez et al., 2015; Hite et  
236 al., 2017; Tao et al., 2017; Zhang et al., 2017), offering a new perspective in our  
237 understanding of its multimodal gating mechanism. However, the CTD-VSD allosteric  
238 coupling as well its molecular nature has yet to be firmly established since their direct  
239 assessment is subject to great experimental challenges. Based on the functional  
240 independence of the distinct structural domains (PD, CTD, and VSD), the energetic  
241 relationship between the sensory modules can be directly defined comparing the voltage  
242 sensor equilibrium change at extreme  $\text{Ca}^{2+}$  stimulus conditions limiting the status of the  
243  $\text{Ca}^{2+}$ -binding sites to two well-defined configurations: unliganded and saturated (Horrigan  
244 and Aldrich, 2002).

245 Using this approach, this work straightforwardly establishes that  $\text{Ca}^{2+}$ -binding to high-  
246 affinity sites make a significant and direct energetic contribution to the equilibrium of the  
247 resting-activated transition (R-A) of the VSD facilitating their activation ( $\Delta V_{\text{H}} = -142.6 \pm$   
248  $4.5$  mV and  $\Delta\Delta G_{\text{V}}^{\text{Ca}} = -7.98 \pm 0.27$  kJ/mol). This result resolves a previous debate  
249 regarding to the magnitude of the  $\text{Ca}^{2+}$ -driven shift of the  $Q_{\text{C}}(V)$  curve, because it has  
250 been reported a similar leftward shift ( $\Delta V_{\text{H}} = -140$  mV and  $\Delta\Delta G_{\text{V}}^{\text{Ca}} = -7.9$  kJ/mol; at  $[\text{Ca}^{2+}]_{\text{i}}$   
251  $= 100$   $\mu\text{M}$ ) (Carrasquel-Ursulaez et al., 2015) and a smaller leftward shift ( $\Delta V_{\text{H}} = -33$  mV  
252 and  $\Delta\Delta G_{\text{V}}^{\text{Ca}} = -1.9$  kJ/mol; at  $[\text{Ca}^{2+}]_{\text{i}} = 70$   $\mu\text{M}$ ) (Horrigan and Aldrich, 2002) at saturating  
253  $\text{Ca}^{2+}$  concentration. The reason for the contradictory findings is not clear to us; since we  
254 used a similar experimental approach. Even if we assumed that the calcium effect on VSD  
255 is underestimated at  $70$   $\mu\text{M}$   $\text{Ca}^{2+}$  (Horrigan and Aldrich, 2002) compared to  $100$   $\mu\text{M}$  as

256 saturating condition of the binding sites, we observed a significant greater effect in  $\text{Ca}^{2+}$   
257 concentrations (1, 5 and 10  $\mu\text{M}$ , **Figure 1C**) where less than 50% of the  $\text{Ca}^{2+}$  sensors are  
258 occupied ( $K_D = 11 \mu\text{M}$  (Cox et al., 1997; Horrigan and Aldrich, 2002)).

259 Fluorescence studies that optically track the motions of the voltage sensor or gating ring  
260 provide two lines of evidence that support these findings. First, conformational  
261 rearrangements of the voltage sensors detected using voltage-clamp fluorometry can be  
262 provoked by  $\text{Ca}^{2+}$ -binding to the high-affinity sites. The sudden rise of intracellular  $[\text{Ca}^{2+}]$   
263 by UV flash induced-photolysis of caged  $\text{Ca}^{2+}$  prompts a leftward shift in both  
264 conductance-voltage ( $G(V)$ ) and fluorescence-voltage ( $F(V)$ ) relationships. These  
265 results suggest that functional activation of the gating ring is propagated to VSD leading  
266 to structural perturbations of voltages sensors, thereby favoring its active conformation  
267 (Savalli et al., 2012). Second, the structural rearrangement of gating ring in response to  
268  $\text{Ca}^{2+}$  has a voltage dependence (Miranda et al., 2013, 2018) attributable to the voltage  
269 sensor operation. The origin of these voltage-dependent motions has been recently  
270 established via modifications on the voltage-sensing function of the BK channel using the  
271 patch-clamp fluorometry technique (Miranda et al., 2018). Both the charged residue  
272 mutations on the S4 transmembrane segment (R210, R213, and E219) and the co-  
273 expression of  $\beta 1$ -subunit with  $\text{BK}\alpha$  channel modify the conformational changes of the  
274 gating ring triggered by depolarization in correspondence to the observed  $G(V)$  shift for  
275 these channel constructs. In contrast, perturbations of pore opening equilibrium like the  
276 F315A mutation or the assembly of  $\text{BK}\alpha$  channel with  $\gamma 1$ -subunit does not modify on the  
277 voltage-dependent reorganization of the gating ring (Miranda et al., 2018).

278 Mechanistically and in a channel opening-independent fashion, how does the CTD-VSD  
279 coupling occur? Taking into account the homotetrameric configuration of the BK channel,  
280 Horrigan and Aldrich (Horrigan and Aldrich, 2002) defined the general gating scheme of

281 BK channel considering the simplest CTD-VSD interaction model in which voltage sensors  
282 and  $\text{Ca}^{2+}$ -binding sites solely interact within the same subunit. However, the VSD  
283 movement at non-saturating  $\text{Ca}^{2+}$  conditions which entail distinct functional states of the  
284  $\text{Ca}^{2+}$  sites (unliganded and liganded), unveiled that the standard HA model can not explain  
285 the mechanistic interaction governing the allosteric coupling between the  $\text{Ca}^{2+}$  and voltage  
286 sensors. Given that  $\text{Ca}^{2+}$ -binding will influence only a fraction of voltage sensors, Scheme  
287 I would evidence  $Q_C(V)$  curves characteristic of an all-or-none model showing two well-  
288 distinguishable components Boltzmann that correspond to  $\text{Ca}^{2+}$ -affected and unaffected  
289 VSD fractions (**Figure 3A**). Conversely, an energetic effect of each  $\text{Ca}^{2+}$ -site on all the  
290 voltage sensors of the tetramer would lead to an equivalent functional status of each VSD,  
291 so that the  $Q_C(V)$  curves behaving in an incremental shifted fashion as increasing the  
292 fractional occupancy of the  $\text{Ca}^{2+}$  sites. The VSD and  $\text{Ca}^{2+}$  sites interacting in such a fashion  
293 (Scheme II) reproduce reasonably well the behavior of the  $\text{Ca}^{2+}$ -dependent gating charge  
294 movement observed in our experiments (**Figure 3B**). This concerted CTD-VSD  
295 communication may underlie a mechanism analogous to the mechanical strategy of  
296 interaction between the homooctameric ring of RCK domains and the pore module  
297 described for bacterial  $\text{K}^+$  channels (Jiang et al., 2002; Ye et al., 2006; Lingle, 2007; Pau  
298 et al., 2011; Smith et al., 2012, 2013). Both in MthK and BK channels, the  $\text{Ca}^{2+}$ -site  
299 occupancy triggers a conformational change conveying to a symmetric overall  
300 rearrangement of the cytosolic tetrameric structure that finally is propagated to the  
301 transmembrane regions (TMD) via C-linker and in the BK channel also via the protein-  
302 protein interfaces between the gating ring and the TMD (Jiang et al., 2002, 2003; Ye et  
303 al., 2006; Yuan et al., 2010, 2012; Pau et al., 2011; Smith et al., 2012; Tao et al., 2017).  
304 Consequently, we can speculate that each  $\text{Ca}^{2+}$ -binding event produces a gradual

305 conformational expansion of the gating ring affecting the four voltage sensors in each step  
306 through the progressive perturbations within the protein-protein interfaces.

307 As mentioned above, the communication pathway through which the  $\text{Ca}^{2+}$ -driven  
308 conformational changes are propagated to the voltage sensors appears to critically reside  
309 on the CTD-VSD interface that involves non-covalent interactions between RCK1 N-lobe  
310 and S0-S4 transmembrane segments (Yang et al., 2007, 2008, 2010; Sun et al., 2013;  
311 Hite et al., 2017; Tao et al., 2017). Scanning mutagenesis of RCK1-N terminal subdomain  
312 indicated that residues on the  $\beta\text{A}-\alpha\text{C}$  region are involved into the allosteric connection of  
313 the  $\text{Ca}^{2+}$ -dependent activation mediated by RCK1 site occupancy but not to the  $\text{Ca}^{2+}$  bowl  
314 (Yang et al., 2010). In line with this study, the selective activation of the RCK1 domain was  
315 identified to be responsible for the  $\text{Ca}^{2+}$ -induced VSD rearrangement (Savalli et al., 2012)  
316 and the voltage dependence of the  $\text{Ca}^{2+}$ -driven motions of gating ring (Miranda et al.,  
317 2016, 2018), suggesting that CTD-VSD allosteric coupling is primarily determined by the  
318 RCK1 site. However, our results are inconsistent with this picture. The constructs  
319 D362A/D367A and 5D5A (D894A-D898A) selectively impaired the  $\text{Ca}^{2+}$ -sensitivity of the  
320 RCK1- and RCK2-sensors, respectively, by neutralization of residues that are involved in  
321 contributing to  $\text{Ca}^{2+}$ -coordination (Zhang et al., 2010; Tao et al., 2017). Comparing the fast  
322 gating charge movement at 0  $\text{Ca}^{2+}$  and saturating  $\text{Ca}^{2+}$  conditions reflects that the  
323 energetic effect of  $\text{Ca}^{2+}$ -binding on voltage sensor equilibrium is practically identical ( $\sim -4$   
324 kJ/mol) for either the D362A/D367A mutations or 5D5A mutations (**Figure 4**). Thus, our  
325 findings establish that the RCK2-driven contribution to CTD-VSD energetic coupling is  
326 quite similar to the RCK1-driven contribution. The functional role of the RCK2-sensor on  
327  $\text{Ca}^{2+}$ -sensitivity of VSD activation was further corroborated using the M513I mutation  
328 (**Figure 5**). This point mutation hinders the  $\text{Ca}^{2+}$ -dependent activation associated with the  
329 RCK1-sensor presumably by disrupting the structural integrity of the binding site and the



330 transduction via through the  $\beta$ A- $\alpha$ C region (Zhang et al., 2010). Thus, another residue  
331 involved in the BK  $\text{Ca}^{2+}$ -dependent activation mediated by the RCK1  $\text{Ca}^{2+}$ -binding site but  
332 not forming part of the site itself decreases the  $Q_C(V)$  leftward shift almost in the same  
333 amount as it does the D362A/D367A mutant.

334 Interestingly, beyond the energetic contribution of each RCK site to the voltage sensor  
335 equilibrium is the same, its addition mimics the VSD  $\text{Ca}^{2+}$ -sensitivity of the fully occupied  
336 sites. These findings remind us of early reports showing that each RCK site mutant shifts  
337 the  $\text{Ca}^{2+}$ -dependent  $G(V)$  by approximately half relative to WT channels (Bao et al., 2002;  
338 Xia et al., 2002). Our results suggest an autonomy of the two RCK-sensors indicating  
339 independent allosteric pathways through which they exert their modulation on the VSD but  
340 does not discard some cooperativity effect between them. Indeed, various lines of  
341 evidence indicate albeit modest a cooperativity between the two high-affinity  $\text{Ca}^{2+}$ -binding  
342 sites although their nature is still unclear (Qian et al., 2006; Sweet and Cox, 2008; Savalli  
343 et al., 2012). Intra and intersubunit structural connectivity support the putative cooperative  
344 interactions between the  $\text{Ca}^{2+}$  sensors at the gating ring (Yuan et al., 2012; Hite et al.,  
345 2017). Actually, a recently functional study of the intrasubunit connections between the  
346 RCK1 site and  $\text{Ca}^{2+}$  bowl (R514-Y904/E902 interactions) has shown that such  
347 connections are potential candidates of the structural determinants underlying to a  
348 cooperative mechanism between the RCK1- and RCK2-sensor involving either to  
349 preserve the integrity of RCK1  $\text{Ca}^{2+}$ -binding site or the allosteric propagation pathway  
350 towards transmembrane domains (Kshatri et al., 2018). On the basis of the cryo-EM  
351 structure of *Aplysia californica* BK channel, Hite et al. (Hite et al., 2017) proposed that  
352 there should be a positive cooperativity of the  $\text{Ca}^{2+}$ -binding at RCK1 site and  $\text{Ca}^{2+}$  bowl  
353 since the  $\text{Ca}^{2+}$ -induced conformational change of the RCK1-N lobes from closed to open  
354 configuration depends on functional state (unliganded and liganded) of both RCK sites.

355 Our analysis based on the CTD-VSD interaction model predicted a small and positive  
356 cooperative relation ( $G = 2.6$ ) among the two high-affinity  $\text{Ca}^{2+}$  sites within the same  $\alpha$ -  
357 subunit, which has been suggested by an earlier study (Qian et al., 2006). It is noteworthy  
358 that  $K_D$  parameters achieved for each  $\text{Ca}^{2+}$ -binding sites ( $K_{D1} = 15.6 \mu\text{M}$  and  $K_{D2} = 1.9$   
359  $\mu\text{M}$ ) by the experimental data fitting agrees very well with the apparent  $\text{Ca}^{2+}$  affinities  
360 previously reported in the literature (Bao et al., 2002; Xia et al., 2002; Sweet and Cox,  
361 2008). Together, all this new information recapitulate a more relevant functional role of the  
362 cooperative interactions between RCK sensors within the same subunit on  $\text{Ca}^{2+}$ -  
363 dependent activation of the channel (Qian et al., 2006).

364 In conclusion, our results depict a remarkable, and direct energetic direct interplay  
365 between the specialized sensory modules (VSD and CTD). Our findings together with the  
366 emerging structural-functional information establish a new paradigm about how the stimuli  
367 integration (depolarization and intracellular  $\text{Ca}^{2+}$ ) modulates the BK channel activation and  
368 its relevance within a physiological context. Notable and unexpected is the equivalent role  
369 of the distinct ligand-binding sites at the cytosolic domain to the allosteric regulation on  
370 voltage sensing. Additional studies to discern the molecular bases underlying in the  $\text{Ca}^{2+}$   
371 and voltage propagation pathways and the cooperative interactions of the RCK1 and  
372 RCK2 regulatory domains may provide new clues about the dual gating mechanism of BK  
373 channel.

## 374 **Methods**

### 375 **Channel Expression.**

376 *Xenopus laevis* oocytes were used as a heterologous system to express BK channels.  
377 The cDNA coding for the human BK  $\alpha$ -subunit (U11058) was provided by L. Toro  
378 (University of California, Los Angeles, CA). The cDNA coding for independent mutants of  
379 each two high-affinity  $\text{Ca}^{2+}$  site from BK channel, the double mutant D362A/D367A (Xia et  
380 al., 2002) and the mutant M513I (Bao et al., 2002) in the RCK1  $\text{Ca}^{2+}$ -binding site and the  
381 mutant 5D5A (Schreiber and Salkoff, 1997) (D894A/D895A/D896A/D897A/D898A) in the  
382 RCK2  $\text{Ca}^{2+}$ -binding site or calcium bowl, were kindly provided by M. Holmgren (National  
383 Institutes of Health, Bethesda, MD). The cRNA was prepared by using mMMESSAGE  
384 mMACHINE (Ambion) for *in vitro* transcription. *Xenopus laevis* oocytes were injected with  
385 50 ng of cRNA and incubated in an ND96 solution (in mM: 96 NaCl, 2 KCl, 1.8  $\text{CaCl}_2$ , 1  
386  $\text{MgCl}_2$ , 5 HEPES, pH 7.4) at 18°C for 4–8 days before electrophysiological recordings.

### 387 **Electrophysiological recordings.**

388 All recordings were made by using the patch-clamp technique in the inside-out  
389 configuration. Data were acquired with an Axopatch 200B (Molecular Devices) amplifier  
390 and the Clampex 10 (Molecular Devices) acquisition software. Gating current ( $I_G$ ) records  
391 were elicited by 1-ms voltage steps from  $-90$  to  $350$  mV in increments of  $10$  mV. Both the  
392 voltage command and current output were filtered at  $20$  kHz with 8-pole Bessel low-pass  
393 filter (Frequency Devices). Current signals were sampled with a 16-bit A/D converter  
394 (Digidata 1550B; Molecular Devices), using a sampling rate of  $500$  kHz. Linear membrane  
395 capacitance and leak subtraction were performed based on a P/4 protocol (Armstrong and  
396 Bezanilla, 1974).

397 Borosilicate capillary glasses (1B150F-4, World Precision Instruments) were pulled in a  
398 horizontal pipette puller (Sutter Instruments). After fire-polished, pipette resistance was  
399 0.5-1 M $\Omega$ . The external (pipette) solution contained (in mM): 110 tetraethylammonium  
400 (TEA)-MeSO<sub>3</sub>, 10 HEPES, 2 MgCl<sub>2</sub>; pH was adjusted to 7.0. The internal solution (bath)  
401 contained (in mM): N-methyl-D-glucamine (NMDG)-MeSO<sub>3</sub>, 10 HEPES, and 5 EGTA for  
402 “zero Ca<sup>2+</sup>” solution (~0.8 nM, based on the presence of ~10  $\mu$ M contaminant [Ca<sup>2+</sup>] (Cui  
403 et al., 1997). For test solutions at different Ca<sup>2+</sup> concentrations (0.1-100  $\mu$ M), CaCl<sub>2</sub> was  
404 added to reach the desired free [Ca<sup>2+</sup>], and 5 mM EGTA (0.1-0.5  $\mu$ M) or HEDTA (1-10  $\mu$ M)  
405 was used as calcium buffer. No Ca<sup>2+</sup> chelator was used in 100  $\mu$ M free Ca<sup>2+</sup> solutions.  
406 Free calcium concentration was estimated using the WinMaxChelator Software and  
407 checked with a Ca<sup>2+</sup>-electrode (Hanna Instruments). All experiments were performed at  
408 room temperature (20-22 °C). To measure  $I_G$  at different Ca<sup>2+</sup> concentrations in the same  
409 oocyte, the patch was excised and washed with an appropriate internal solution at least  
410 10 times the chamber volume.

#### 411 **Data Analysis.**

412 All data analysis was performed using Clampfit 10 (Molecular Devices), Matlab  
413 (MathWorks) and Excel 2007 (Microsoft). The first 50-100  $\mu$ s of the ON-gating currents  
414 were fitted to a single exponential function and the area under the curve was integrated to  
415 obtain the charge displaced between closed states ( $Q_C$ ) (Horrigan and Aldrich, 1999,  
416 2002; Contreras et al., 2012; Carrasquel-Ursulaez et al., 2015).  $Q_C(V)$  data for each  
417 [Ca<sup>2+</sup>]<sub>i</sub> were fitted using a Boltzmann function:  $Q_C(V) = \frac{Q_{C, \text{MAX}}}{1 + e^{\left(\frac{-z_Q F(V - V_H)}{RT}\right)}}$ , where  
418  $Q_{C, \text{MAX}}$  is the maximum charge,  $z_Q$  is the voltage dependency of activation,  $V_H$  is the  
419 half-activation voltage,  $T$  is the absolute temperature (typically 295 K),  $F$  is the Faraday's

420 constant, and  $R$  is the universal gas constant.  $Q_{C, \text{MAX}}$ ,  $V_H$ , and  $z_Q$  were determined  
421 using least square minimization.  $Q_C(V)$  curves were aligned by shifting them along the  
422 voltage axis by the mean  $\Delta V = (\langle V_H \rangle - V_H)$  to generate a mean curve that did not alter  
423 the voltage dependence (Horrigan and Aldrich, 1999). All error estimates are SEM.

424 The  $\text{Ca}^{2+}$ -induced effect on VSD activation was quantified as the  $V_H$  shift relative to “zero”  
425  $\text{Ca}^{2+}$  condition:  $\Delta V_H = V_H([\text{Ca}^{2+}]_i) - V_H(0[\text{Ca}^{2+}]_i)$ . For wild-type (WT) BK channel and  
426 the RCK  $\text{Ca}^{2+}$ -sensor mutants (D362A/D367A, M513I and 5D5A), the energetic  
427 contribution of  $\text{Ca}^{2+}$ -binding on resting-active (R-A) equilibrium of the voltage sensor was  
428 calculated as changes in Gibbs free energy of VSD activation induced by  $100 \mu\text{M}$   $\text{Ca}^{2+}$ :

$$429 \quad \Delta\Delta G_V^{Ca} = F \left( z_Q(100 \mu\text{M} [\text{Ca}^{2+}]_i) V_H(100 \mu\text{M} [\text{Ca}^{2+}]_i) - z_Q(0 [\text{Ca}^{2+}]_i) V_H(0 [\text{Ca}^{2+}]_i) \right).$$

### 430 **Model fitting.**

431 We fit the  $Q_C(V, [\text{Ca}^{2+}])$  experimental data using two distinct interaction mechanism  
432 between  $\text{Ca}^{2+}$ -binding sites and voltage sensor (see Scheme I and Scheme II in the **Figure**  
433 **2A,B**) within the framework of Horrigan-Aldrich (HA) general allosteric model (Horrigan  
434 and Aldrich, 2002). Assumptions and considerations for the equations that describe each  
435 one of the  $\text{Ca}^{2+}$ -VSD interaction schemes are given in the *Supplementary Information*. In  
436 terms of the HA allosteric mechanisms, the voltage sensor R-A equilibrium is defined by

437 the equilibrium constant  $J$  according to the relation  $J = e^{\frac{z_J F(V-V_H)}{RT}} = J_0 e^{\frac{z_J FV}{RT}}$ , where  $J_0$

438 is the zero voltage equilibrium constant and  $z_J$  the gating charges displacement per  
439 voltage sensor. In this fashion, the fraction of the total charge displaced essentially  
440 between closed states,  $(Q_C(V)/Q_{C, \text{MAX}})$  in the absence of calcium can be written as:

441  $Q_C(V)/Q_{C, \text{MAX}} (\text{Ca}^{2+} \ll K_D) = \frac{1}{1+J^{-1}}$ , where  $K_D$  is the dissociation constant of the

442 high-affinity calcium-binding site with all voltage sensors at rest and the channel closed.

443 In the presence of saturating  $\text{Ca}^{2+}$  (100  $\mu\text{M}$ ), the equilibrium of the R-A transition  $J$

444 becomes amplified by the allosteric factor  $E$ , which defines the coupling between  $\text{Ca}^{2+}$ -

445 binding sites and voltage sensors, being  $Q_C(V)/Q_{C, \text{MAX}} (\text{Ca}^{2+} \gg K_D) = \frac{1}{1+(JE)^{-1}}$

446 and  $JE = J_0 e^{\frac{RT \ln(E) + z_j FV}{RT}}$ . The  $Q_C(V)/Q_{C, \text{MAX}}$  measured in the presence of high

447  $[\text{Ca}^{2+}]$  and “zero  $\text{Ca}^{2+}$ ” condition at the same voltage (so that  $J$  be canceled out) but in the

448 limit where voltage where  $J^{-1} \gg 1$  is :

449 
$$\frac{Q_C(V)/Q_{C, \text{MAX}} (\text{Ca}^{2+} \gg K_D)}{Q_C(V)/Q_{C, \text{MAX}} (\text{Ca}^{2+} \ll K_D)} \Big|_{(\lim J^{-1} \gg 1)} = \frac{JE}{J} = E$$

450 Thus, the Gibbs free energy perturbation of the voltage sensor R-A equilibrium when the

451 high-affinity binding sites are approximately 100% occupied by  $\text{Ca}^{2+}$  (100  $\mu\text{M}$ ) is a

452 straightforward measure of the allosteric factor  $E$ :  $E = e^{-\Delta\Delta G_V^{Ca}/RT}$ .

453 Based on these conditions, the allosteric parameter  $E$  values were calculated and

454 introduced in each of the two  $\text{Ca}^{2+}$ -VSD interaction models as a fixed parameter. Once  $E$

455 was obtained, the families of  $Q_C(V, [\text{Ca}^{2+}])$  curves were simultaneously fitted to the

456 model equations (Equation 3 and Equation 6) (see *Supplementary information*) by

457 minimizing least-squares estimating the  $z_j$ ,  $J_0$  and  $K_D$  parameters for each model. To

458 select the better  $\text{Ca}^{2+}$ -VSD interaction scheme that describes the experimental data, the

459 model fits were compared according to their Akaike Information Criterion (AIC) (Akaike,

460 1974) values, calculated as  $\text{AIC} = 2p - 2 \ln(L)$ , where  $p$  is the number of free

461 parameters and  $\ln(L)$  is the maximum log-likelihood of the model. The best model fitting  
462 is that achieving the lowest AIC values. Minimum AIC values were used as model selection  
463 criteria.

464 The best model fit of the  $\text{Ca}^{2+}$ -VSD interaction scheme was extended including two high-  
465 affinity  $\text{Ca}^{2+}$ -binding sites per  $\alpha$ -subunit (**Figure 2—figure supplement 2D,E**). The  
466 contribution of each  $\text{Ca}^{2+}$ -binding site to the free energy of the voltage sensor equilibrium  
467 may be split in two, such as  $E = E_{S1} * E_{S2} = e^{-\left(\Delta\Delta G_V^{Ca(S1)} + \Delta\Delta G_V^{Ca(S2)}\right)/RT}$ , where  $E_{S1}$   
468 and  $E_{S2}$  are the allosteric factor  $E$  for the RCK1 and RCK2 sites. Thus, for the global fit of  
469 the  $Q_C(V, [\text{Ca}^{2+}])$  curves, we constrained the allosteric parameter  $E_{S1}$  and  $E_{S2}$  obtained  
470 experimentally for the RCK2  $\text{Ca}^{2+}$ -sensor mutant (5D5A) and RCK1  $\text{Ca}^{2+}$ -sensor mutant  
471 (D362A/D367A), respectively, as described above. The rest of the parameters  $z_j, J_0, K_{D1},$   
472  $K_{D2}$ , and  $G$ , where  $K_{D1}$  and  $K_{D2}$  are the dissociation constants of the RCK1 and RCK2  
473 sites and  $G$  is a cooperativity factor between the two sites within the same  $\alpha$ -subunit of  
474 the BK channel, were allowed to vary freely.

475 **References**

- 476 Akaike H. 1974. A new look at the statistical model identification. *IEEE Trans Automat*  
477 *Contr* **19**:716–723. DOI:10.1109/TAC.1974.1100705
- 478 Armstrong CM, Bezanilla F. 1974. Charge movement associated with the opening and  
479 closing of the activation gates of the Na channels. *J Gen Physiol* **63**:533–552.  
480 DOI:10.1085/jgp.63.5.533
- 481 Bao L, Rapin AM, Holmstrand EC, Cox DH. 2002. Elimination of the BKCa Channel's  
482 High-Affinity Ca<sup>2+</sup> Sensitivity. *J Gen Physiol* **120**:173–189.  
483 DOI:10.1085/jgp.20028627
- 484 Bao L, Kaldany C, Holmstrand EC, Cox DH. 2004. Mapping the BK Ca Channel's "Ca<sup>2+</sup>  
485 Bowl." *J Gen Physiol* **123**:475–489. DOI:10.1085/jgp.200409052
- 486 Carrasquel-Ursulaez W, Contreras GF, Sepúlveda R V, Aguayo D, González-Nilo F,  
487 González C, Latorre R. 2015. Hydrophobic interaction between contiguous residues  
488 in the S6 transmembrane segment acts as a stimuli integration node in the BK  
489 channel. *J Gen Physiol* **145**:61–74. DOI:10.1085/jgp.201411194
- 490 Contreras GF, Neely A, Alvarez O, Gonzalez C, Latorre R. 2012. Modulation of BK  
491 channel voltage gating by different auxiliary  $\beta$  subunits. *Proc Natl Acad Sci USA*  
492 **109**:18991–6. DOI:10.1073/pnas.1216953109
- 493 Cox DH, Cui J, Aldrich RW. 1997. Allosteric gating of a large conductance Ca-activated  
494 K<sup>+</sup> channel. *J Gen Physiol* **110**:257–281. DOI:10.1085/jgp.110.3.257
- 495 Cui J, Cox DH, Aldrich RW. 1997. Intrinsic voltage dependence and Ca<sup>2+</sup> regulation of  
496 mslo large conductance Ca-activated K<sup>+</sup> channels. *J Gen Physiol* **109**:647–673.  
497 DOI:10.1085/jgp.109.5.647
- 498 Cui J, Aldrich RW. 2000. Allosteric Linkage between Voltage and Ca<sup>2+</sup>-Dependent  
499 Activation of BK-Type mslo1 K<sup>+</sup> Channels. *Biochemistry* **39**:15612–15619.  
500 DOI:10.1021/bi001509+



- 501 Hite RK, Tao X, MacKinnon R. 2017. Structural basis for gating the high-conductance  
502 Ca<sup>2+</sup>-activated K<sup>+</sup> channel. *Nature* **541**:52–57. DOI:10.1038/nature20775
- 503 Horrigan FT, Cui J, Aldrich RW. 1999. Allosteric voltage gating of potassium channels I.  
504 Mslo ionic currents in the absence of Ca<sup>2+</sup>. *J Gen Physiol* **114**:277–304.
- 505 Horrigan FT, Aldrich RW. 1999. Allosteric voltage gating of potassium channels II. Mslo  
506 channel gating charge movement in the absence of Ca<sup>2+</sup>. *J Gen Physiol* **114**:305–  
507 336. DOI:10.1085/jgp.114.2.305
- 508 Horrigan FT, Aldrich RW. 2002. Coupling between voltage sensor activation, Ca<sup>2+</sup> binding  
509 and channel opening in large conductance (BK) potassium channels. *J Gen Physiol*  
510 **120**:267–305. DOI:10.1085/jgp.20028605
- 511 Hou P, Xiao F, Liu H, Yuchi M, Zhang G, Wu Y, Wang W, Zeng W, Ding M, Cui J, Wu Z,  
512 Wang L-Y, Ding J. 2016. Extrapolating microdomain Ca<sup>2+</sup> dynamics using BK  
513 channels as a Ca<sup>2+</sup> sensor. *Sci Rep* **6**:17343. DOI:10.1038/srep17343
- 514 Jiang Y, Lee A, Chen J, Cadene M, Chait BT, Mackinnon R. 2002. Crystal structure and  
515 mechanism of a calcium-gated potassium channel 515–522.
- 516 Jiang Y, Ruta V, Chen J, Lee A, Mackinnon R. 2003. The principle of gating charge  
517 movement in a voltage-dependent K channel. *Nature* **423**:42–48.
- 518 Kshatri AS, Gonzalez-Hernandez AJ, Giraldez T. 2018. Functional validation of Ca<sup>2+</sup>-  
519 binding residues from the crystal structure of the BK ion channel. *BBA - Biomembr*  
520 **1860**:943–952. DOI:10.1016/j.bbamem.2017.09.023
- 521 Latorre R, Castillo K, Carrasquel-Ursulaez W, Sepulveda R V, Gonzalez-Nilo F, Gonzalez  
522 C, Alvarez O. 2017. Molecular Determinants of BK Channel Functional Diversity and  
523 Functioning. *Physiol Rev* **97**:39–87. DOI:10.1152/physrev.00001.2016
- 524 Latorre R, Vergara C, Hidalgo C. 1982. Reconstitution in planar lipid bilayers of a Ca<sup>2+</sup>-  
525 dependent K<sup>+</sup> channel from transverse tubule membranes isolated from rabbit  
526 skeletal muscle. *Proc Natl Acad Sci USA* **79**:805–809. DOI:10.1073/pnas.79.3.805

- 527 Lingle CJ. 2007. Gating Rings Formed by RCK Domains: Keys to Gate Opening. *J Gen*  
528 *Physiol* **129**:101–107. DOI:10.1085/jgp.200709739
- 529 Marty A. 1981. Ca-dependent K channels with large unitary conductance in chromaffin  
530 cell membranes. *Nature* **291**:497–500.
- 531 Miranda P, Contreras JE, Plested AJR, Sigworth FJ, Holmgren M, Giraldez T. 2013. State-  
532 dependent FRET reports calcium- and voltage-dependent gating-ring motions in BK  
533 channels. *Proc Natl Acad Sci USA* **110**:5217–5222. DOI:10.1073/pnas.1219611110
- 534 Miranda P, Holmgren M, Giraldez T. 2018. Voltage-dependent dynamics of the BK  
535 channel cytosolic gating ring are coupled to the membrane-embedded voltage  
536 sensor. *Elife* **7**:e40664. DOI:10.7554/eLife.40664
- 537 Miranda P, Giraldez T, Holmgren M. 2016. Interactions of divalent cations with calcium  
538 binding sites of BK channels reveal independent motions within the gating ring. *Proc*  
539 *Natl Acad Sci USA* **113**:14055–14060. DOI:10.1073/pnas.1611415113
- 540 Oberhauser A, Alvarez O, Latorre R. 1988. Activation by divalent cations of a Ca<sup>2+</sup>-  
541 activated K<sup>+</sup> channel from skeletal muscle membrane. *J Gen Physiol* **92**:67–86.  
542 DOI:10.1085/jgp.92.1.67
- 543 Pallotta BS, Magleby KL, Barrett JN. 1981. Single channel recordings of Ca<sup>2+</sup>-activated  
544 K<sup>+</sup> currents in rat muscle cell culture. *Nature* **293**:471–474.
- 545 Pau VPT, Smith FJ, Taylor AB, Parfenova L V, Samakai E, Callaghan MM, Abarca-  
546 Heidemann K, Hart PJ, Rothberg BS. 2011. Structure and function of multiple Ca<sup>2+</sup>-  
547 binding sites in a K<sup>+</sup> channel regulator of K<sup>+</sup> conductance (RCK) domain. *Proc Natl*  
548 *Acad Sci USA* **108**:17684–17689. DOI:10.1073/pnas.1107229108
- 549 Qian X, Niu X, Magleby KL. 2006. Intra- and Intersubunit Cooperativity in Activation of BK  
550 Channels by Ca<sup>2+</sup>. *J Gen Physiol* **128**:389–404. DOI:10.1085/jgp.200609486
- 551 Rothberg BS, Magleby KL. 1999. Gating kinetics of single large-conductance Ca<sup>2+</sup>-  
552 activated K<sup>+</sup> channels in high Ca<sup>2+</sup> suggest a two-tiered allosteric gating

- 553 mechanism. *J Gen Physiol* **114**:93–124. DOI:10.1085/jgp.114.1.93
- 554 Rothberg BS, Magleby KL. 2000. Voltage and Ca<sup>2+</sup> activation of single large-conductance  
555 Ca<sup>2+</sup>-activated K<sup>+</sup> channels described by a two-tiered allosteric gating mechanism.  
556 *J Gen Physiol* **116**:75–99. DOI:10.1085/jgp.116.1.75
- 557 Savalli N, Pantazis A, Yusifov T, Sigg D, Olcese R. 2012. The contribution of RCK domains  
558 to human BK channel allosteric activation. *J Biol Chem* **287**:21741–21750.  
559 DOI:10.1074/jbc.M112.346171
- 560 Schreiber M, Salkoff L. 1997. A novel calcium-sensing domain in the BK channel. *Biophys*  
561 *J* **73**:1355–1363. DOI:10.1016/S0006-3495(97)78168-2
- 562 Shen KZ, Lagrutta A, Davies NW, Standen NB, Adelman JP, North RA. 1994.  
563 Tetraethylammonium block of Slowpoke calcium-activated potassium channels  
564 expressed in *Xenopus* oocytes: evidence for tetrameric channel formation. *Pflugers*  
565 *Arch* **426**:440–445.
- 566 Smith FJ, Pau VPT, Cingolani G, Rothberg BS. 2012. Crystal structure of a Ba<sup>2+</sup>-bound  
567 gating ring reveals elementary steps in RCK domain activation. *Structure* **20**:2038–  
568 2047. DOI:10.1016/j.str.2012.09.014
- 569 Smith FJ, Pau VPT, Cingolani G, Rothberg BS. 2013. Structural basis of allosteric  
570 interactions among Ca<sup>2+</sup>-binding sites in a K<sup>+</sup>-channel RCK domain. *Nat Commun*  
571 **4**:1–10. DOI:10.1038/ncomms3621
- 572 Stefani E, Ottolia M, Noceti F, Olcese R, Wallner M, Latorre R. 1997. Voltage-controlled  
573 gating in a large conductance Ca<sup>2+</sup> sensitive K<sup>+</sup> channel (hslo). *Proc Natl Acad Sci*  
574 *USA* **94**:5427–5431.
- 575 Sun X, Shi J, Delaloye K, Yang X, Yang H, Zhang G, Cui J. 2013. The Interface between  
576 Membrane-Spanning and Cytosolic Domains in Ca<sup>2+</sup>-Dependent K<sup>+</sup> Channels Is  
577 Involved in Subunit Modulation of Gating. *J Neurosci* **33**:11253–11261.  
578 DOI:10.1523/JNEUROSCI.0620-13.2013

- 579 Sweet T-B, Cox DH. 2008. Measurements of the BKCa channel's high-affinity Ca<sup>2+</sup>  
580 binding constants: effects of membrane voltage. *J Gen Physiol* **132**:491–505.  
581 DOI:10.1085/jgp.200810094
- 582 Tao X, Hite RK, MacKinnon R. 2017. Cryo-EM structure of the open high-conductance  
583 Ca<sup>2+</sup>-activated K<sup>+</sup> channel. *Nature* **541**:46–51. DOI:10.1038/nature20608
- 584 Wu Y, Yang Y, Ye S, Jiang Y. 2010. Structure of the gating ring from the human large-  
585 conductance Ca<sup>2+</sup>-gated K<sup>+</sup> channel. *Nature* **466**:393–397.  
586 DOI:10.1038/nature09252
- 587 Xia X-M, Zeng X, Lingle CJ. 2002. Multiple regulatory sites in large-conductance calcium-  
588 activated potassium channels. *Nature* **418**:880–884. DOI:10.1038/nature00956
- 589 Yang H, Hu L, Shi J, Delaloye K, Horrigan FT, Cui J. 2007. Mg<sup>2+</sup> mediates interaction  
590 between the voltage sensor and cytosolic domain to activate BK channels. *Proc Natl*  
591 *Acad Sci USA* **104**:18270–5. DOI:10.1073/pnas.0705873104
- 592 Yang H, Shi J, Zhang G, Yang J, Delaloye K, Cui J. 2008. Activation of Slo1 BK channels  
593 by Mg<sup>2+</sup> coordinated between the voltage sensor and RCK1 domains. *Nat Struct Mol*  
594 *Biol* **15**:1152–1159. DOI:10.1038/nsmb.1507
- 595 Yang H, Zhang G, Cui J. 2015. BK channels: multiple sensors, one activation gate. *Front*  
596 *Physiol* **6**:1–16. DOI:10.3389/fphys.2015.00029
- 597 Yang J, Krishnamoorthy G, Saxena A, Zhang G, Shi J, Yang H, Delaloye K, Sept D, Cui  
598 J. 2010. An Epilepsy/Dyskinesia-Associated Mutation Enhances BK Channel  
599 Activation by Potentiating Ca<sup>2+</sup> Sensing. *Neuron* **66**:871–883.  
600 DOI:10.1016/j.neuron.2010.05.009
- 601 Ye S, Li Y, Chen L, Jiang Y. 2006. Crystal Structures of a Ligand-free MthK Gating Ring:  
602 Insights into the Ligand Gating Mechanism of K<sup>+</sup> Channels. *Cell* **126**:1161–1173.  
603 DOI:10.1016/j.cell.2006.08.029
- 604 Yuan P, Leonetti MD, Pico AR, Hsiung Y, MacKinnon R. 2010. Structure of the Human

605 BK Channel Ca<sup>2+</sup>-Activation Apparatus at 3.0 Å Resolution. *Science (80- )* **329**:182–  
606 186. DOI:10.1126/science.1190414.Structure

607 Yuan P, Leonetti MD, Hsiung Y, MacKinnon R. 2012. Open structure of the Ca<sup>2+</sup> gating  
608 ring in the high-conductance Ca<sup>2+</sup>-activated K<sup>+</sup> channel. *Nature* **481**:94–97.  
609 DOI:10.1038/nature10670

610 Zeng X-H, Xia X-M, Lingle CJ. 2005. Divalent Cation Sensitivity of BK Channel Activation  
611 Supports the Existence of Three Distinct Binding Sites. *J Gen Physiol* **125**:273–286.  
612 DOI:10.1085/jgp.200409239

613 Zhang G, Huang S-Y, Yang J, Shi J, Yang X, Moller A, Zou X, Cui J. 2010. Ion sensing in  
614 the RCK1 domain of BK channels. *Proc Natl Acad Sci USA* **107**:18700–18705.  
615 DOI:10.1073/pnas.1010124107

616 Zhang G, Geng Y, Jin Y, Shi J, McFarland K, Magleby KL, Salkoff L, Cui J. 2017. Deletion  
617 of cytosolic gating ring decreases gate and voltage sensor coupling in BK channels.  
618 *J Gen Physiol* **149**:373–387.

619 Zhou Y, Zeng X-H, Lingle CJ. 2012. Barium ions selectively activate BK channels via the  
620 Ca<sup>2+</sup>-bowl site. *Proc Natl Acad Sci USA* **109**:11413–11418.  
621 DOI:10.1073/pnas.1204444109

622 Zhou Y, Yang H, Cui J, Lingle CJ. 2017. Threading the biophysics of mammalian Slo1  
623 channels onto structures of an invertebrate Slo1 channel. *J Gen Physiol* **149**:985–  
624 1007. DOI:10.1085/jgp.201711845

625

626 **Acknowledgments**

627 We thank Mrs. Luisa Soto (University of Valparaiso) for excellent technical assistance. This  
628 research was supported by FONDECYT Grant No. 1150273 and AFOSR No. FA9550-16-  
629 1- 0384 to R.L.; CONICYT-PFCHA Doctoral fellowships to Y.L.C.; FONDECYT Grant No.  
630 1180999 to K.C. The Centro Interdisciplinario de Neurociencia de Valparaiso is a Millennium  
631 Institute supported by the Millennium Scientific Initiative of the Chilean Ministry of Economy,  
632 Development, and Tourism (P029-022-F).

633 **Competing interests**

634 The authors declare no competing financial interests.

635

636 **Figures**

637 **Figure 1.**

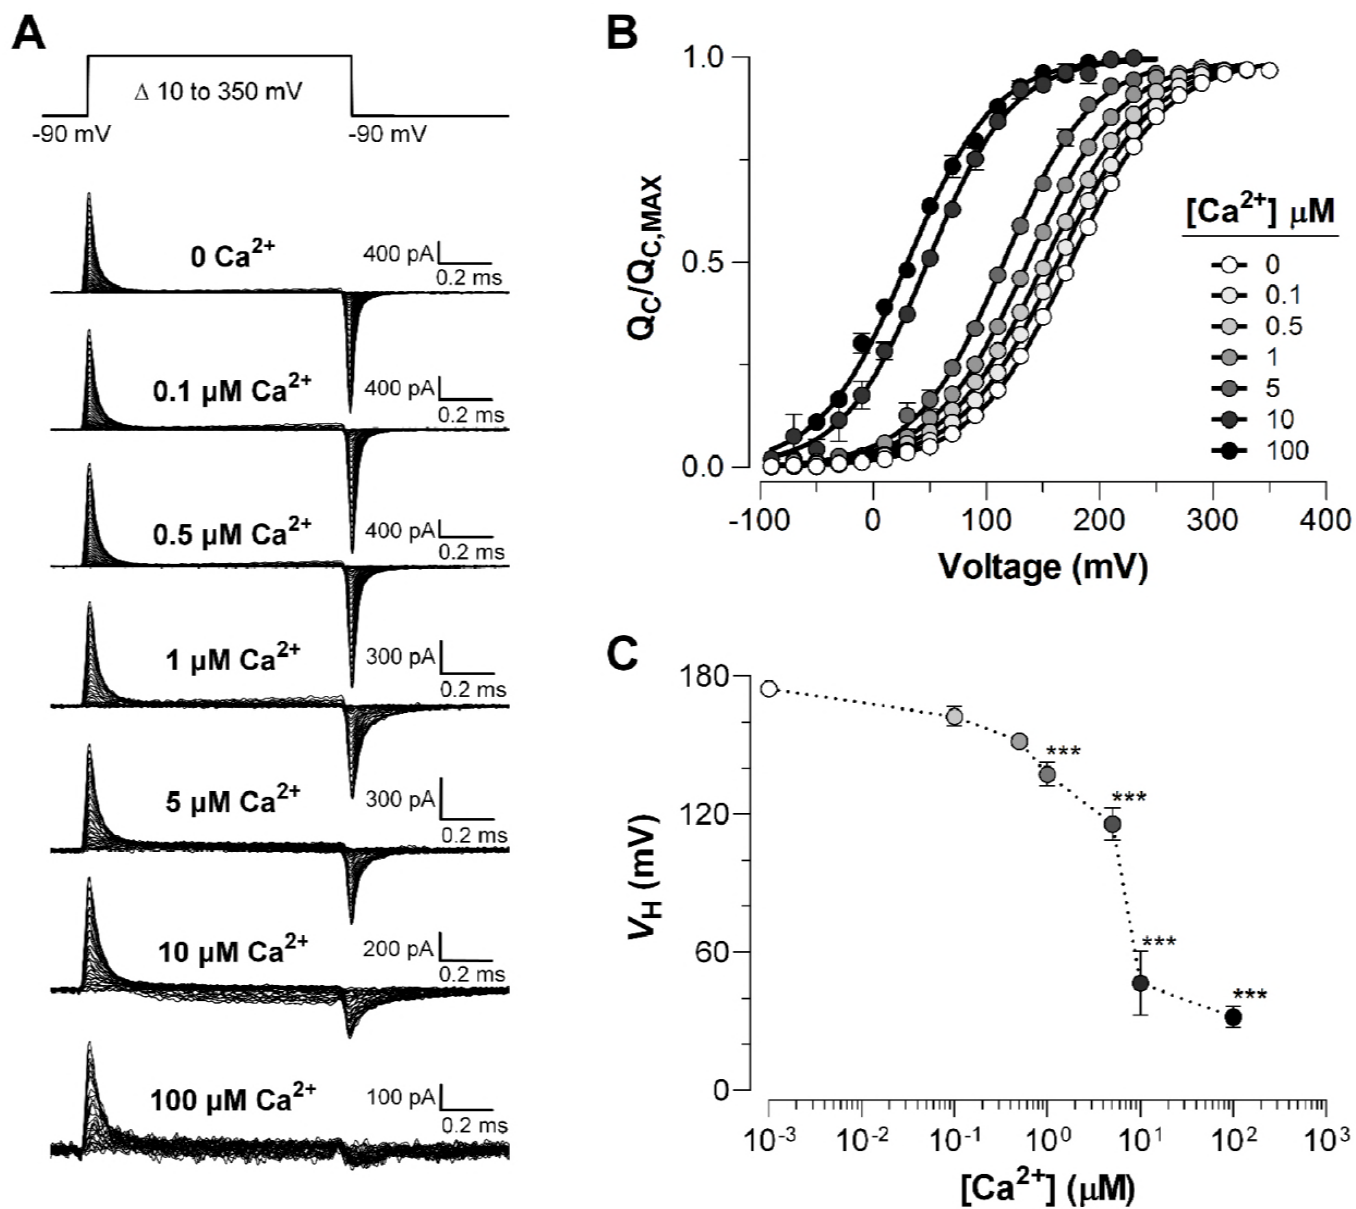

638

639 Figure 2.

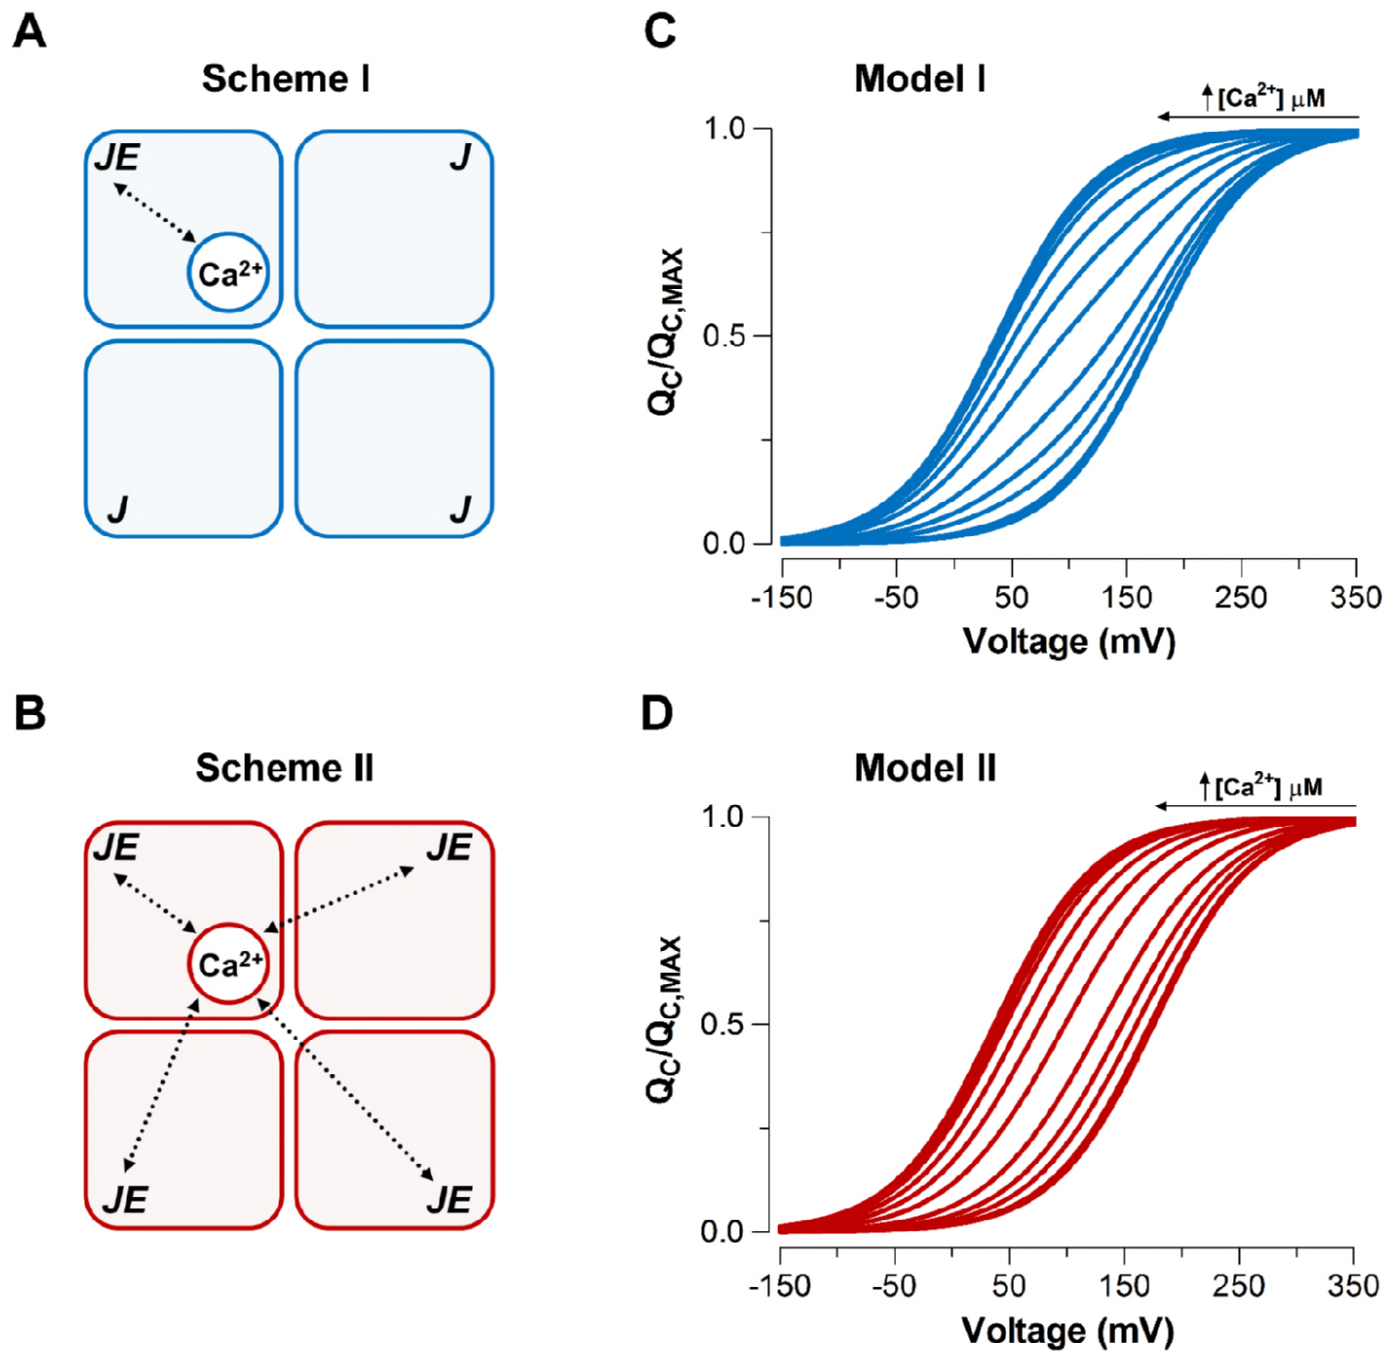

640



641 **Figure 3.**

642

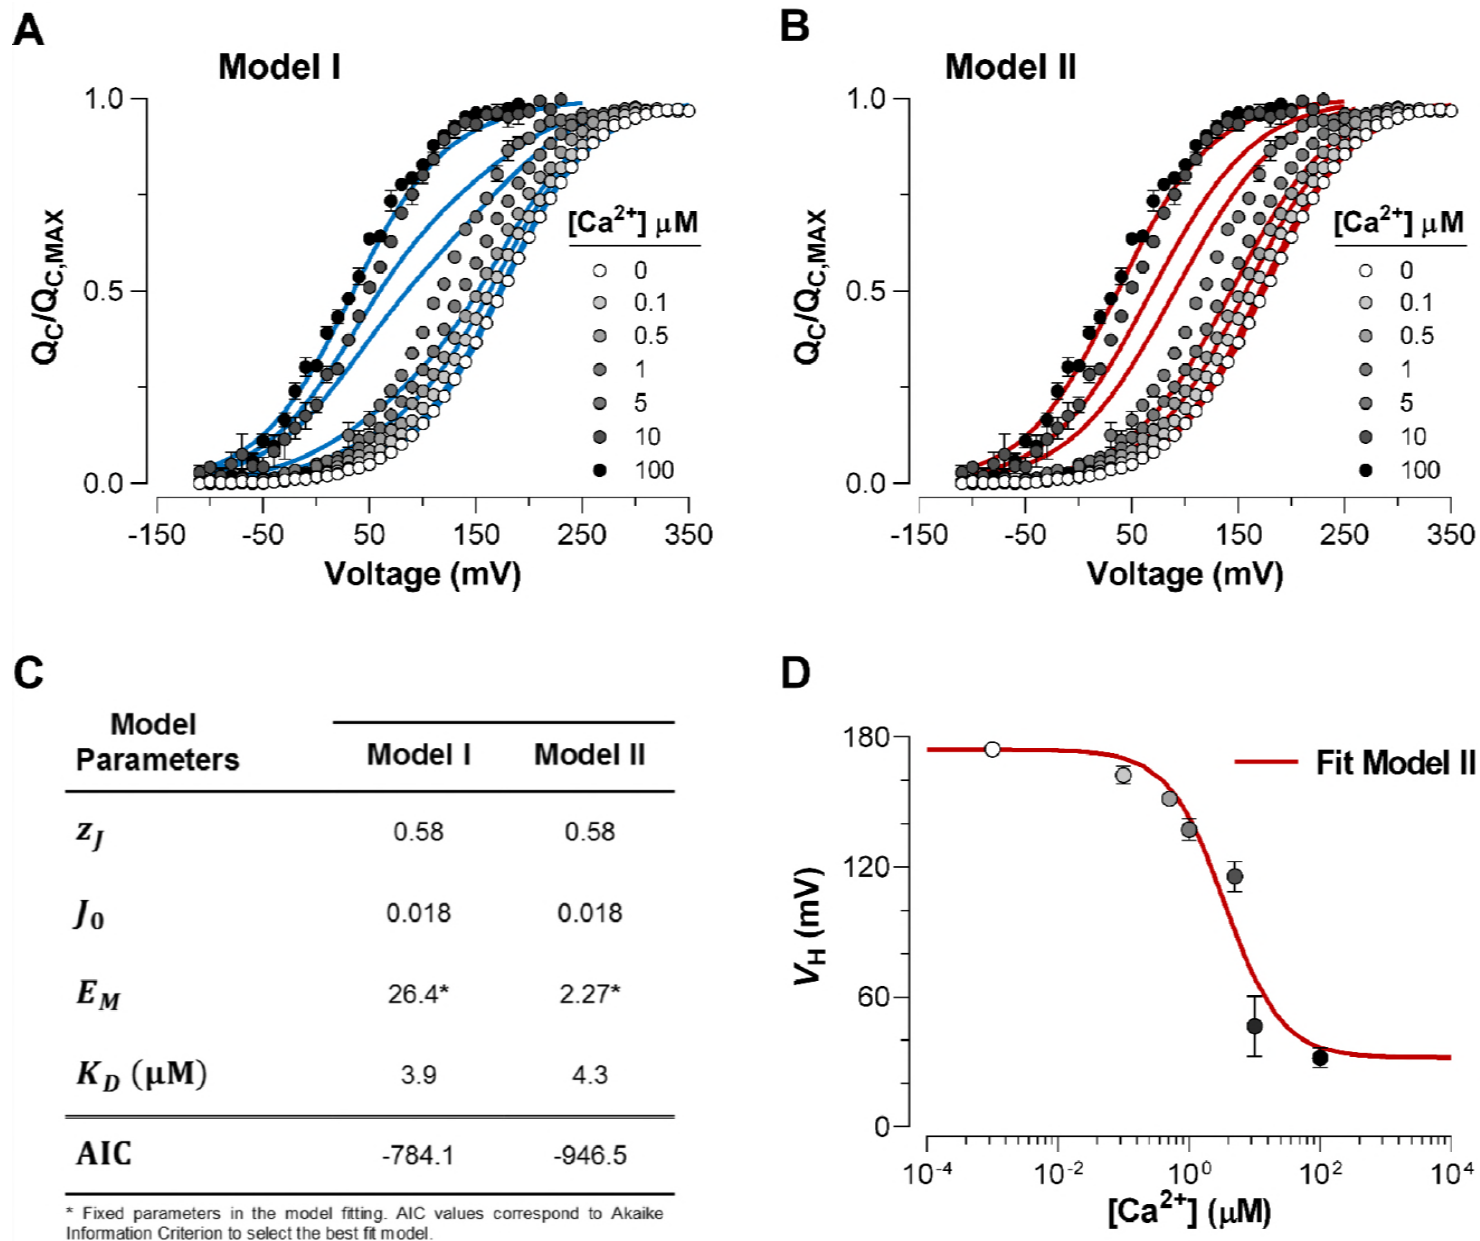

643 **Figure 4.**

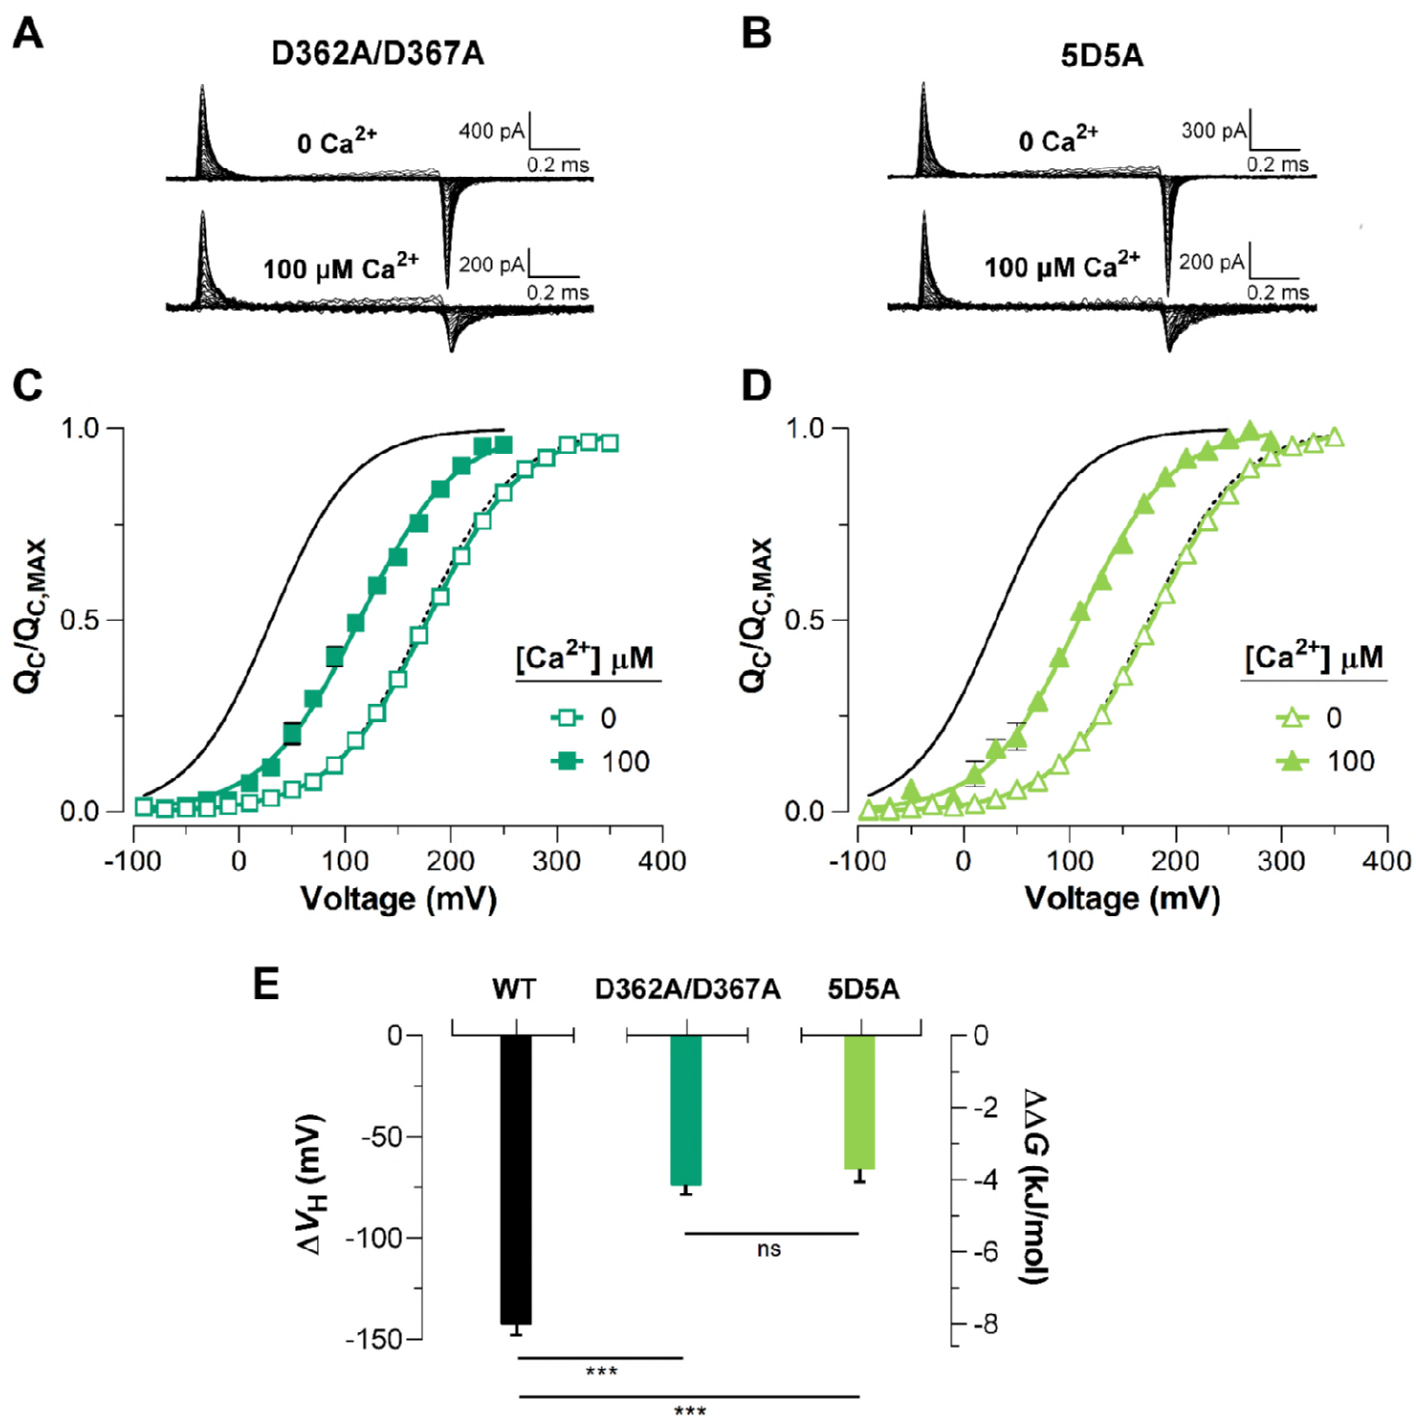

644

645 **Figure 5.**

646

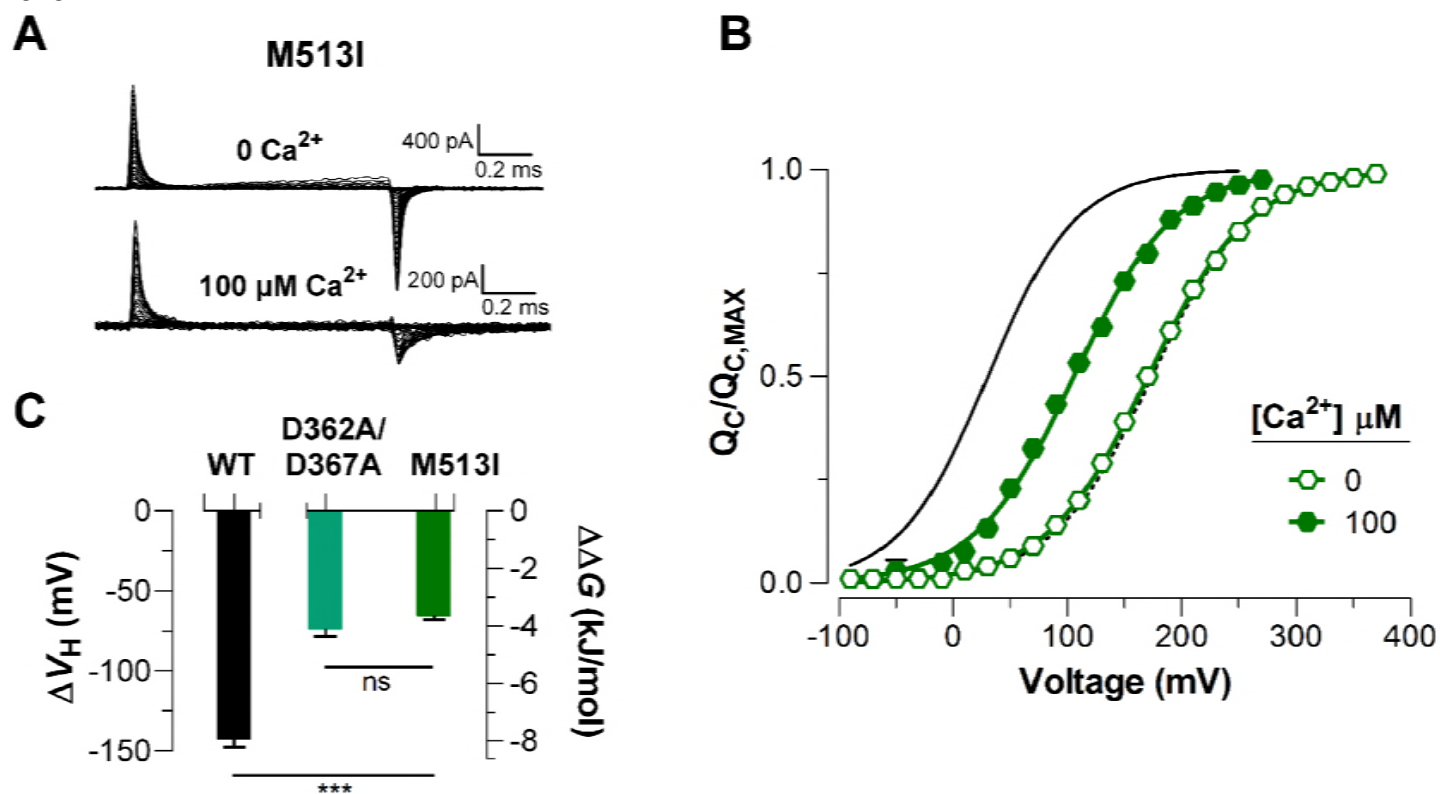

647 **Tables**

648 **Table 1. Parameters for the extended Ca<sup>2+</sup>-VSD interaction model (Model II) including**  
649 **two high-affinity Ca<sup>2+</sup>-binding sites per  $\alpha$ -subunit.**

650

| <b>Model<br/>Parameters</b>                           | <b>Model II</b>               |                                  |
|-------------------------------------------------------|-------------------------------|----------------------------------|
|                                                       | <b>With<br/>cooperativity</b> | <b>Without<br/>cooperativity</b> |
| <b><math>z_J</math></b>                               | 0.58                          | 0.59                             |
| <b><math>J_0</math></b>                               | 0.018                         | 0.018                            |
| <b><math>E_{S1}</math></b>                            |                               | 1.46*                            |
| <b><math>E_{S2}</math></b>                            |                               | 1.52*                            |
| <b><math>K_{D1}</math> (<math>\mu\text{M}</math>)</b> | 15.6                          | 3.9                              |
| <b><math>K_{D2}</math> (<math>\mu\text{M}</math>)</b> | 1.9                           | 2.8                              |
| <b><math>G</math></b>                                 | 2.6                           | 1*                               |
| <b>AIC</b>                                            | -949.9                        | -947.8                           |

\* Fixed parameters in the model fitting. AIC values correspond to Akaike Information Criterion to select the best fit model.

## 651 Legends Figures

652 **Figure 1. Effects of Ca<sup>2+</sup>-binding on VSD activation in BK channels.** (A) Representative  
653 gating current ( $I_G$ ) recordings at different internal Ca<sup>2+</sup> concentrations (from 0 to 100  $\mu$ M).  $I_G$   
654 were evoked by the indicated voltage protocol of 1 ms duration. (B) Gating charge-voltage  
655 relationships ( $Q_C(V)$ ) were obtained by integrating the fast component for each ON  $I_G$  trace.  
656 Normalized gating charge data ( $Q_C(V)/Q_{C, MAX}$ ) (mean  $\pm$  SEM) were fitted using a single  
657 Boltzmann function (solid lines). (C)  $V_H$  obtained from the  $Q_C(V)$  curves as a function of  
658 Ca<sup>2+</sup> concentration (mean  $\pm$  SEM). At zero" Ca<sup>2+</sup> condition  $V_H(0 Ca^{2+}) = 174.5 \pm 2.4$  mV ( $n$   
659 = 25), whereas Ca<sup>2+</sup> binding produce a leftward shift in  $V_H$  ( $\Delta V_H$ ): 0.1  $\mu$ M Ca<sup>2+</sup> ( $\Delta V_H = -$   
660  $12.1 \pm 3.5$  mV,  $n = 5$ ); 0.5  $\mu$ M Ca<sup>2+</sup> ( $\Delta V_H = -22.9 \pm 1.8$  mV,  $n = 5$ ); 1  $\mu$ M Ca<sup>2+</sup> ( $\Delta V_H = -37.1$   
661  $\pm 3.5$  mV,  $n = 5$ ); 5  $\mu$ M Ca<sup>2+</sup> ( $\Delta V_H = -58.8 \pm 6.7$  mV,  $n = 6$ ); 10  $\mu$ M Ca<sup>2+</sup> ( $\Delta V_H = -127.9 \pm$   
662  $13.9$  mV,  $n = 6$ ); 100  $\mu$ M Ca<sup>2+</sup> ( $\Delta V_H = -142.6 \pm 4.5$  mV,  $n = 7$ ). The one-way ANOVA followed  
663 by Dunnett's post-hoc test analysis was used to assess statistical significance of the Ca<sup>2+</sup>-  
664 induced shifts in  $V_H$  (\*\*\*)  $p < 0.001$ ).

665 **Figure 2. Model-dependent behavior of the  $Q_C(V)$  curves based on the CTD-VSD**  
666 **interaction mechanisms according to the fractional occupancy of Ca<sup>2+</sup>-binding sites.**  
667 (A-B) Cartoons representing two interaction schemes between voltage sensors and Ca<sup>2+</sup>-  
668 binding sites (modify from Horrigan and Aldrich (2002)). The Scheme I (A) assume that Ca<sup>2+</sup>-  
669 binding only affects the voltage sensor of one  $\alpha$ -subunit ( $E_{M1}$ ). The Scheme II (B) predicts  
670 that binding of Ca<sup>2+</sup> to one  $\alpha$ -subunit affects VSD in all subunits equally, increasing the  
671 voltage sensor equilibrium constants ( $J$ )  $E_{M2}$ -fold in all four subunits ( $E_{M2}^4$ , when the four  
672 Ca<sup>2+</sup> sites are occupied). In both schemes, a single Ca<sup>2+</sup>-binding site is considered in each

673  $\alpha$ -subunit. **(C-D)** Predictions of  $Q_C(V)$  relationships at different internal calcium  
674 concentration (from 0 to 10 mM) by two distinctive interaction mechanisms between  $\text{Ca}^{2+}$ -  
675 binding sites and voltage sensors (Scheme I and Scheme II), respectively.  $Q_C(V)$  curves  
676 were generated using Equation 4 (blue: Model I) or Equation 6 (red: Model II), and the  
677 following set of parameters:  $z_J = 0.58$ ,  $J_0 = 0.018$ ,  $K_D = 11 \mu\text{M}$  and  $E_{M1} = E_{M2}^4 = 25$ .

678 **Figure 3. Dose-dependent effect of  $\text{Ca}^{2+}$  on voltage sensor activation is predicted by**  
679 **a  $\text{Ca}^{2+}$ -VSD interaction mechanism defining that  $\text{Ca}^{2+}$ -binding equally affects the VSD**  
680 **in all four  $\alpha$ -subunits. (A-B)** The experimental  $Q_C(V)$  data were fitted with the two possible  
681 allosteric interaction mechanisms between voltage and calcium sensors described by the  
682 Scheme I and Scheme II. The blue and red lines represent the global fits by Model I and  
683 Model II, respectively. The allosteric factor  $E$  ( $E_{M1}$  and  $E_{M2}$ ) was constrained to the value  
684 obtained from the individual fitting of the  $Q_C(V)/Q_{C, \text{MAX}}$  curves at 0 and 100  $\mu\text{M}$   $\text{Ca}^{2+}$   
685 (experimental  $E$  ( $E_{exp}$ ) equal to 26.4). The  $z_J$ ,  $J_0$  and  $K_D$  parameters were allowed to vary  
686 freely. **(C)** Parameters for the best fits of the  $Q_C(V)$  data. Note that the allosteric factor  $E$   
687 for Model I ( $E_{M1}$ ) and Model II ( $E_{M2}$ ) have different interpretations, being  $E_{M2} = E_{exp}$   
688 whereas  $E_{M2} = \sqrt[4]{E_{exp}}$  given that the four voltage sensor will be altered in 2.3-fold ( $E_{M2} =$   
689 2.27) with each additional  $\text{Ca}^{2+}$  bound. Based on the Akaike Information Criterion (AIC), the  
690 best model fit to the  $Q_C(V, [\text{Ca}^{2+}])$  data is achieved using the  $\text{Ca}^{2+}$ -VSD interaction scheme  
691 described by Model II. **(D)** The  $\text{Ca}^{2+}$ -dependence of  $V_H$ - $Q_C(V)$  curves are superimposed  
692 with the predicted  $V_H$  by Model II (red line).

693 **Figure 4. The high-affinity  $\text{Ca}^{2+}$ -binding sites contribute equally to allosteric coupling**  
694 **between calcium and voltage sensors in BK channels. (A-B)** Representative gating

695 current ( $I_G$ ) recordings at 0 and 100  $\mu\text{M}$  of  $[\text{Ca}^{2+}]_i$  for the RCK1 site mutant (D362A/D367A)  
696 and the RCK2 site mutant (5D5A), respectively. **(C-D)** Gating charge-voltage curves  
697 ( $Q_C(V)$ ) were obtained at 0  $\text{Ca}^{2+}$  (open symbols) and 100  $\mu\text{M}$   $\text{Ca}^{2+}$  (filled symbols) for  
698 D362A/D367A and 5D5A mutants, respectively. Boltzmann fitting to the experimental data  
699 (mean  $\pm$  SEM) is indicated by solid lines ( $V_{H(\text{D362A/D367A})} = 178.0 \pm 2.7$  mV,  $n = 12$  and  
700  $V_{H(5D5A)} = 176.4 \pm 4.6$  mV,  $n = 17$  at “zero”  $\text{Ca}^{2+}$ ;  $V_{H(\text{D362A/D367A})} = 104.2 \pm 7.3$  mV,  $n = 7$   
701 and  $V_{H(5D5A)} = 110.8 \pm 6.7$  mV,  $n = 6$  at 100  $\mu\text{M}$   $\text{Ca}^{2+}$ ). For comparison, all  $Q_C(V)$  plots  
702 include the Boltzmann fit of the  $Q_C(V)$  curves for WT at 0  $\text{Ca}^{2+}$  (dashed black line) and 100  
703  $\mu\text{M}$   $\text{Ca}^{2+}$  (solid black line). **(e)** Quantification of the  $V_H$  shift ( $\Delta V_H$ ) in the  $Q_C(V)$  curves and  
704 the free energy change ( $\Delta\Delta G_V^{Ca}$ ) induced by 100  $\mu\text{M}$   $\text{Ca}^{2+}$ . The non-parametric  $t$ -test was  
705 used to evaluate statistical significances between WT BK channel and the RCK sites  
706 mutants (\*\* $p < 0.001$ ; ns: non-significant).

707 **Figure 5. Mutations abolishing  $\text{Ca}^{2+}$ -sensing by the RCK1 binding-site reduce the**  
708  **$\text{Ca}^{2+}$ -induced effect on voltage sensors activation similarly.** **(A)** Representative gating  
709 current ( $I_G$ ) recordings at 0 and 100  $\mu\text{M}$  of  $[\text{Ca}^{2+}]_i$  for the RCK1 site mutant M513I. **(B)** Gating  
710 charge-voltage curves  $Q_C(V)$  were obtained at 0  $\text{Ca}^{2+}$  and 100  $\mu\text{M}$   $\text{Ca}^{2+}$  (open and filled  
711 symbols) for the M513I mutant. Boltzmann fitting to the experimental data (mean  $\pm$  SEM) is  
712 indicated by solid lines ( $V_{H(\text{M513I})} = 170.4 \pm 4.4$  mV,  $n = 17$  at “zero”  $\text{Ca}^{2+}$  and  $V_{H(\text{M513I})} =$   
713  $105.0 \pm 6.3$  mV,  $n = 4$  at 100  $\mu\text{M}$   $\text{Ca}^{2+}$ ). For comparison, the  $Q_C(V)$  plot includes the  
714 Boltzmann fit of the  $Q_C(V)$  curves for WT at 0  $\text{Ca}^{2+}$  and 100  $\mu\text{M}$   $\text{Ca}^{2+}$  (dashed and solid  
715 black line). **(C)** Quantification of the  $V_H$  ( $\Delta V_H$ ) shift in the  $Q_C(V)$  curves and the free energy  
716 change induced by 100  $\mu\text{M}$   $\text{Ca}^{2+}$  ( $\Delta\Delta G_V^{Ca}$ ). The non-parametric  $t$ -test was used to compare

717 statistical significances between WT BK channel and the RCK1-site mutants (\*\* $p < 0.001$ ;  
718 ns: non-significant).



## 719 **Supplementary Information**

720 **Assumptions and model predictions.** We assume that the four voltage sensors act  
721 independently transiting between two states, resting (R) and active (A), governed by the  
722 voltage-dependent equilibrium constant  $J$ . The R–A equilibrium is displaced toward the  
723 active state by membrane depolarization generating a fast gating charge movement ( $Q_C$ )  
724 before channels opening. Additionally, the  $\text{Ca}^{2+}$ -binding to high-affinity sites shifts the  
725 voltage sensor equilibrium toward their active configuration through an allosteric coupling  
726 described by the factor  $E$  (**Figure 2—figure supplement 1A**). By assuming the simplified  
727 standard model for the BK channels (Horrigan and Aldrich, 2002), where each  $\alpha$ -subunit has  
728 a single  $\text{Ca}^{2+}$ -binding site, we established the possible states and their connections through  
729 which each voltage sensor transit in presence of  $\text{Ca}^{2+}$  (**Figure 2—figure supplement 1B;C**)  
730 following the CTD-VSD interaction mechanisms described by the Scheme I and Scheme II  
731 (**Figure 2A,B**).

732 For Scheme I, in which  $\text{Ca}^{2+}$ -binding sites and voltage sensors can only interact within the  
733 same  $\alpha$ -subunit, the activation of each VSD can occur through the  $R_0$ - $A_0$  or  $R_1$ - $A_1$  transitions  
734 according to the functional state of the  $\text{Ca}^{2+}$  site (unbound or  $\text{Ca}^{2+}$  bound). The equilibrium  
735 of such transitions is governed by  $J$  or  $JE_{M1}$ , respectively (**Figure 2—figure supplement**  
736 **2B**). In the case of Scheme II, in which binding of  $\text{Ca}^{2+}$  to a single  $\alpha$ -subunit affects the four  
737 voltage sensors equally, the R-A equilibrium of each VSD would be affected by the number  
738 of  $\text{Ca}^{2+}$  bound in the channel (0-4) depicted in the model (Model II) as five possible R-A  
739 transitions. According to this model, the  $J$  constant increase  $E_{M2}$ -fold for each occupied  $\text{Ca}^{2+}$   
740 site (**Figure 2—figure supplement 1C**). For both schemes, the horizontal transitions R-R  
741 and A-A represent the  $\text{Ca}^{2+}$ -binding equilibrium ( $K$  or  $KE$ ) when the VSD is in the resting or

742 active conformation, respectively. The  $K$  equilibrium constant is defined as the  
743 bound/unbound probability ratio for each  $\text{Ca}^{2+}$ -binding site and depends on  $\text{Ca}^{2+}$   
744 concentration ( $[\text{Ca}^{2+}]$ ) and the  $\text{Ca}^{2+}$  dissociation constant ( $K_D$ ):  $K = [\text{Ca}^{2+}]/K_D$ .

745 Here, we assume that the voltage sensor movement at ON-gating currents is in equilibrium  
746 relative to the binding of  $\text{Ca}^{2+}$ . The assumption is reasonable since the  $\text{Ca}^{2+}$ -binding rate  
747 constant estimated for BK channel is about  $10^8 \text{ M}^{-1}\text{s}^{-1}$  (Hou et al., 2016) implying that at 10  
748  $\mu\text{M}$  internal  $\text{Ca}^{2+}$  the association time constant is 1 ms. Thus,  $\text{Ca}^{2+}$  binding at this  $\text{Ca}^{2+}$   
749 concentration proceeds at a pace about 33-fold slower than the voltage sensor movement  
750 ( $\sim 30 \mu\text{s}$ ). Based on this consideration, the R-A transitions in the models would be  
751 predominant transitions whose proportion will be determined by the  $[\text{Ca}^{2+}]$  and  $K_D$ .  
752 Therefore, predictions of the  $Q_C(V)$  curves at different  $\text{Ca}^{2+}$  concentrations for Model I and  
753 Model II were based on a given fractional occupancy of  $\text{Ca}^{2+}$  sites established by the  
754 probability of  $\text{Ca}^{2+}$  bound ( $b$ ) and unbound ( $1 - b$ ) for each  $\text{Ca}^{2+}$ -sensor, and the energetic  
755 contribution to VSD equilibrium.

756 Simulations of the  $Q_C(V)$  curves using the Scheme I (Model I) were obtained using the  
757 equation

$$758 \quad \frac{Q_C(V)}{Q_{C, \text{MAX}}} = (1 - b) \left( \frac{1}{1 + J^{-1}} \right) + b \left( \frac{1}{1 + (JE_{M1})^{-1}} \right) \quad (1);$$

759 where

$$760 \quad b = \frac{1}{1 + K^{-1}} = \frac{1}{1 + \frac{K_D}{[\text{Ca}^{2+}]}} = \frac{[\text{Ca}^{2+}]}{[\text{Ca}^{2+}] + K_D} \quad (2);$$

761 and

762 
$$J = J_0 e^{\frac{z_J F V}{RT}} \quad (3)$$

763 Substituting  $b$  and  $J$  into Equation (1), the  $\text{Ca}^{2+}$ -dependent voltage sensor activation for  
 764 Model I is given by the equation

765 
$$\frac{Q_C(V)}{Q_{C, \text{MAX}}} = \left( \frac{K_D}{[\text{Ca}^{2+}] + K_D} \right) \left( \frac{1}{1 + \frac{e^{\frac{-z_J F V}{RT}}}{J_0}} \right) + \left( \frac{[\text{Ca}^{2+}]}{[\text{Ca}^{2+}] + K_D} \right) \left( \frac{1}{1 + \frac{e^{\frac{-z_J F V}{RT}}}{J_0 E_{M1}}} \right) \quad (4)$$

766 Thus, the  $Q_C(V)$  curves are determined by the proportion of two functional VSD populations  
 767 with a distinctive effect (unliganded effect or  $\text{Ca}^{2+}$ -saturated effect) Consequently, the  
 768  $Q_C(V)$  curves are represented by a weighted sum of two Boltzmann functions.

769 Meanwhile, for the concerted CTD-VSD interaction Scheme II (Model II), the  $Q_C(V, [\text{Ca}^{2+}])$   
 770 curves would be determined using the general equation:

771 
$$\frac{Q_C(V)}{Q_{C, \text{MAX}}} = \sum_{x=0}^n \binom{n}{x} (1-b)^{n-x} b^x \left( \frac{1}{1 + (J E_{M2}^x)^{-1}} \right) \quad (5)$$

772 The expression in the first bracket represents the fraction of VSD belonging to a channel  
 773 with  $x$  (0 to 4)  $\text{Ca}^{2+}$  bound, according to a binomial probability distribution. Thus, the  $Q_C(V)$   
 774 curves result in a weighted sum of five distinct Boltzmann functions corresponding to the  
 775 five possible R-A transitions (**Figure 2—figure supplement 1C**). By stating  $n = 4$  because  
 776 the tetrameric symmetry of the channels, and substituting  $b$  and  $J$  into the previous equation  
 777 (Equation 5) we have

$$778 \quad \frac{Q_C(V)}{Q_{C, \text{MAX}}} = \sum_{x=0}^4 \binom{4}{x} \left( \frac{K_D}{[Ca^{2+}] + K_D} \right)^{4-x} \left( \frac{[Ca^{2+}]}{[Ca^{2+}] + K_D} \right)^x \left( \frac{1}{1 + \frac{e^{-zJFV/RT}}{J_0 E_{M2}^x}} \right) \quad (6)$$

779 It should be noted that at limiting  $Ca^{2+}$  conditions, both schemes become equivalent where  
 780 the VSD activation is characterized by a single Boltzmann function. At zero  $Ca^{2+}$ , the  $Q_C(V)$   
 781 curves are described by

$$782 \quad \frac{Q_C(V)}{Q_{C, \text{MAX}}} = \left( \frac{1}{1 + \frac{e^{-zJFV/RT}}{J_0}} \right),$$

783 whereas  $Ca^{2+}$  saturating concentration  $J$  is multiply by the allosteric factor  $E$ , where  $E =$   
 784  $E_{M1} = E_{M2}^4$  depending on the model (Model I or Model II):

$$785 \quad \frac{Q_C(V)}{Q_{C, \text{MAX}}} = \left( \frac{1}{1 + \frac{e^{-zJFV/RT}}{J_0 E}} \right)$$

786 Given that each  $\alpha$ -subunit has two  $Ca^{2+}$ -binding sites, we expanded the CTD-VSD  
 787 interaction Scheme II (**Figure 2—figure supplement 1C**) considering the existence of two  
 788  $Ca^{2+}$ -binding sites (**Figure 2—figure supplement 1D,E**). The Model II includes the  
 789 energetic contribution of RCK1 and RCK2  $Ca^{2+}$ -sites to the VSD activation. The factor  $E =$   
 790  $E_{S1} * E_{S2}$  where  $E_{S1}$  and  $E_{S1}$  are the allosteric coupling between the VSD and the RCK1  
 791  $Ca^{2+}$ -site and RCK2  $Ca^{2+}$ -site, respectively. The  $K_1$  and  $K_2$  constants define the  
 792 bound/unbound transition for each RCK1 and RCK2 sites being  $K_1 = [Ca^{2+}]/K_{D1}$  and

793  $K_2 = [Ca^{2+}] / K_{D2}$ . Assuming that the  $Ca^{2+}$  sensors of distinct  $\alpha$ -subunit do not interact,  
794 we only consider intrasubunit cooperativity between the RCK1 and RCK2 sites defined by  
795 the factor  $G$ . Thus, the occupancy of one RCK site will affect  $Ca^{2+}$ -binding equilibrium to the  
796 other RCK site in the  $\alpha$ -subunit ( $GK_1$  and  $GK_2$ ) (**Figure 2—figure supplement 1E**). The  
797 equilibrium  $J$  of the VSD increase  $E_{S1}$ -fold and  $E_{S2}$ -fold for the each  $Ca^{2+}$  bound to RCK1  
798 and RCK2 sites, respectively, reaching to  $JE_{S1}^4 E_{S2}^4$  when the eight  $Ca^{2+}$  sites are occupied.

799 **Supplementary Figures**

800 **Figure 1—figure supplement 1.**

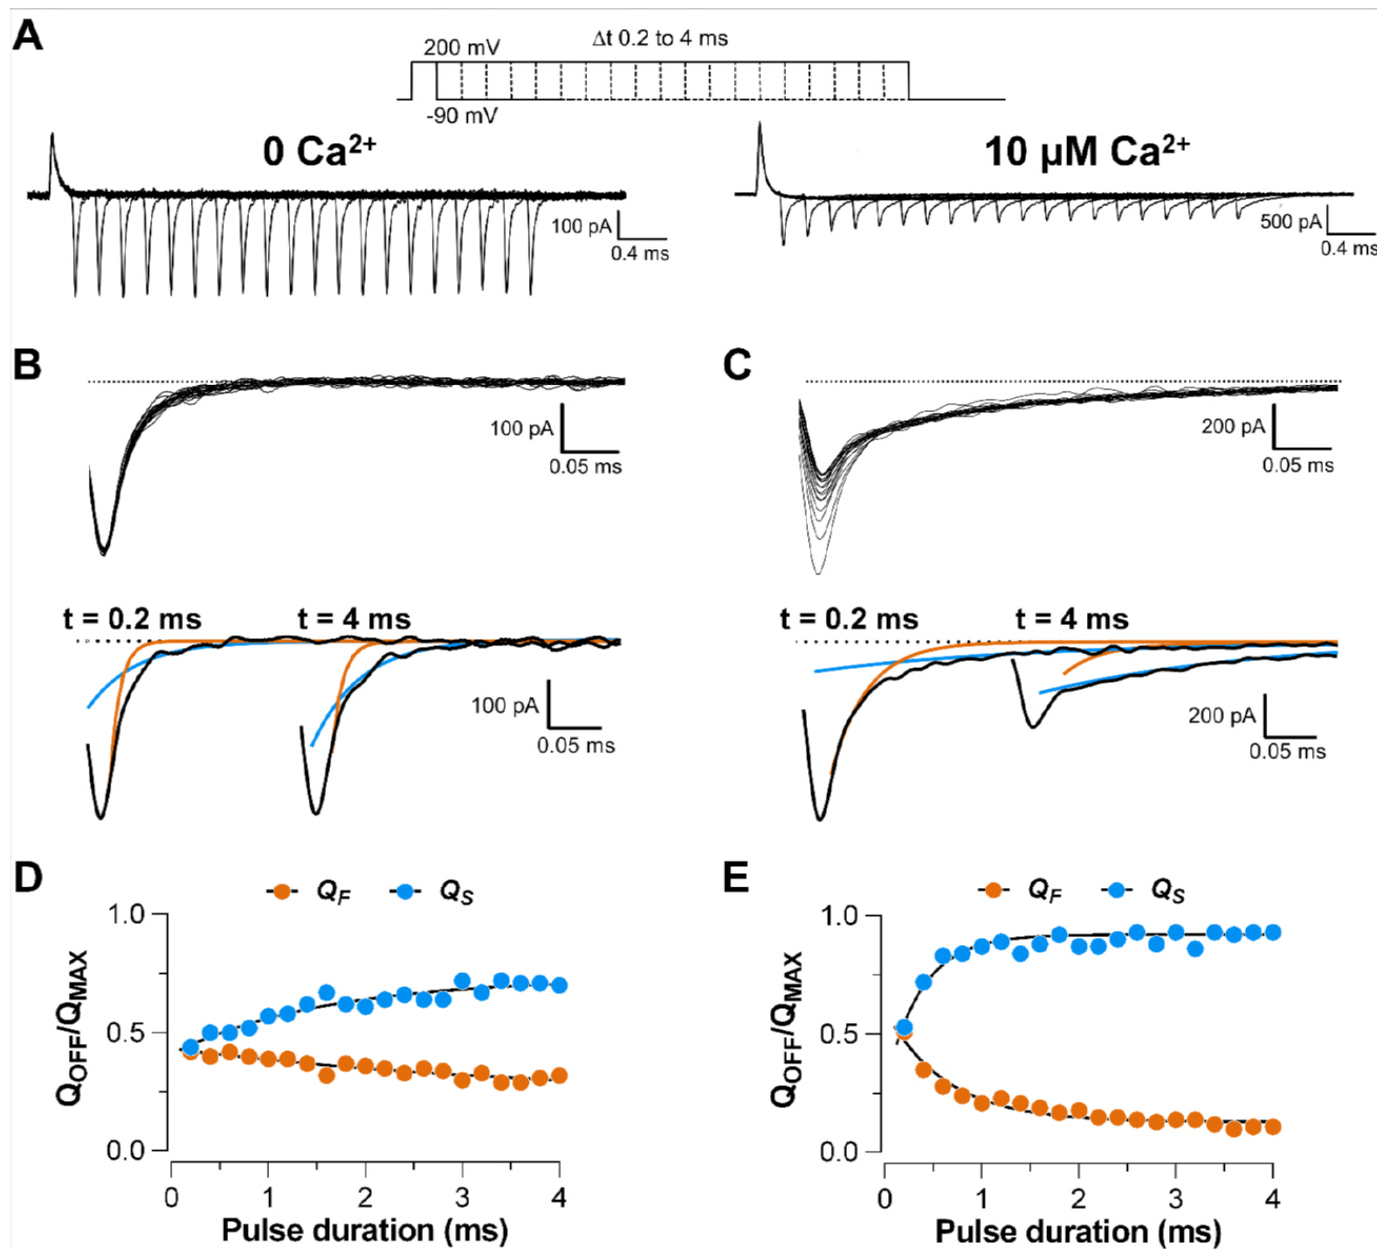

801

802 Figure 2—figure supplement 1.

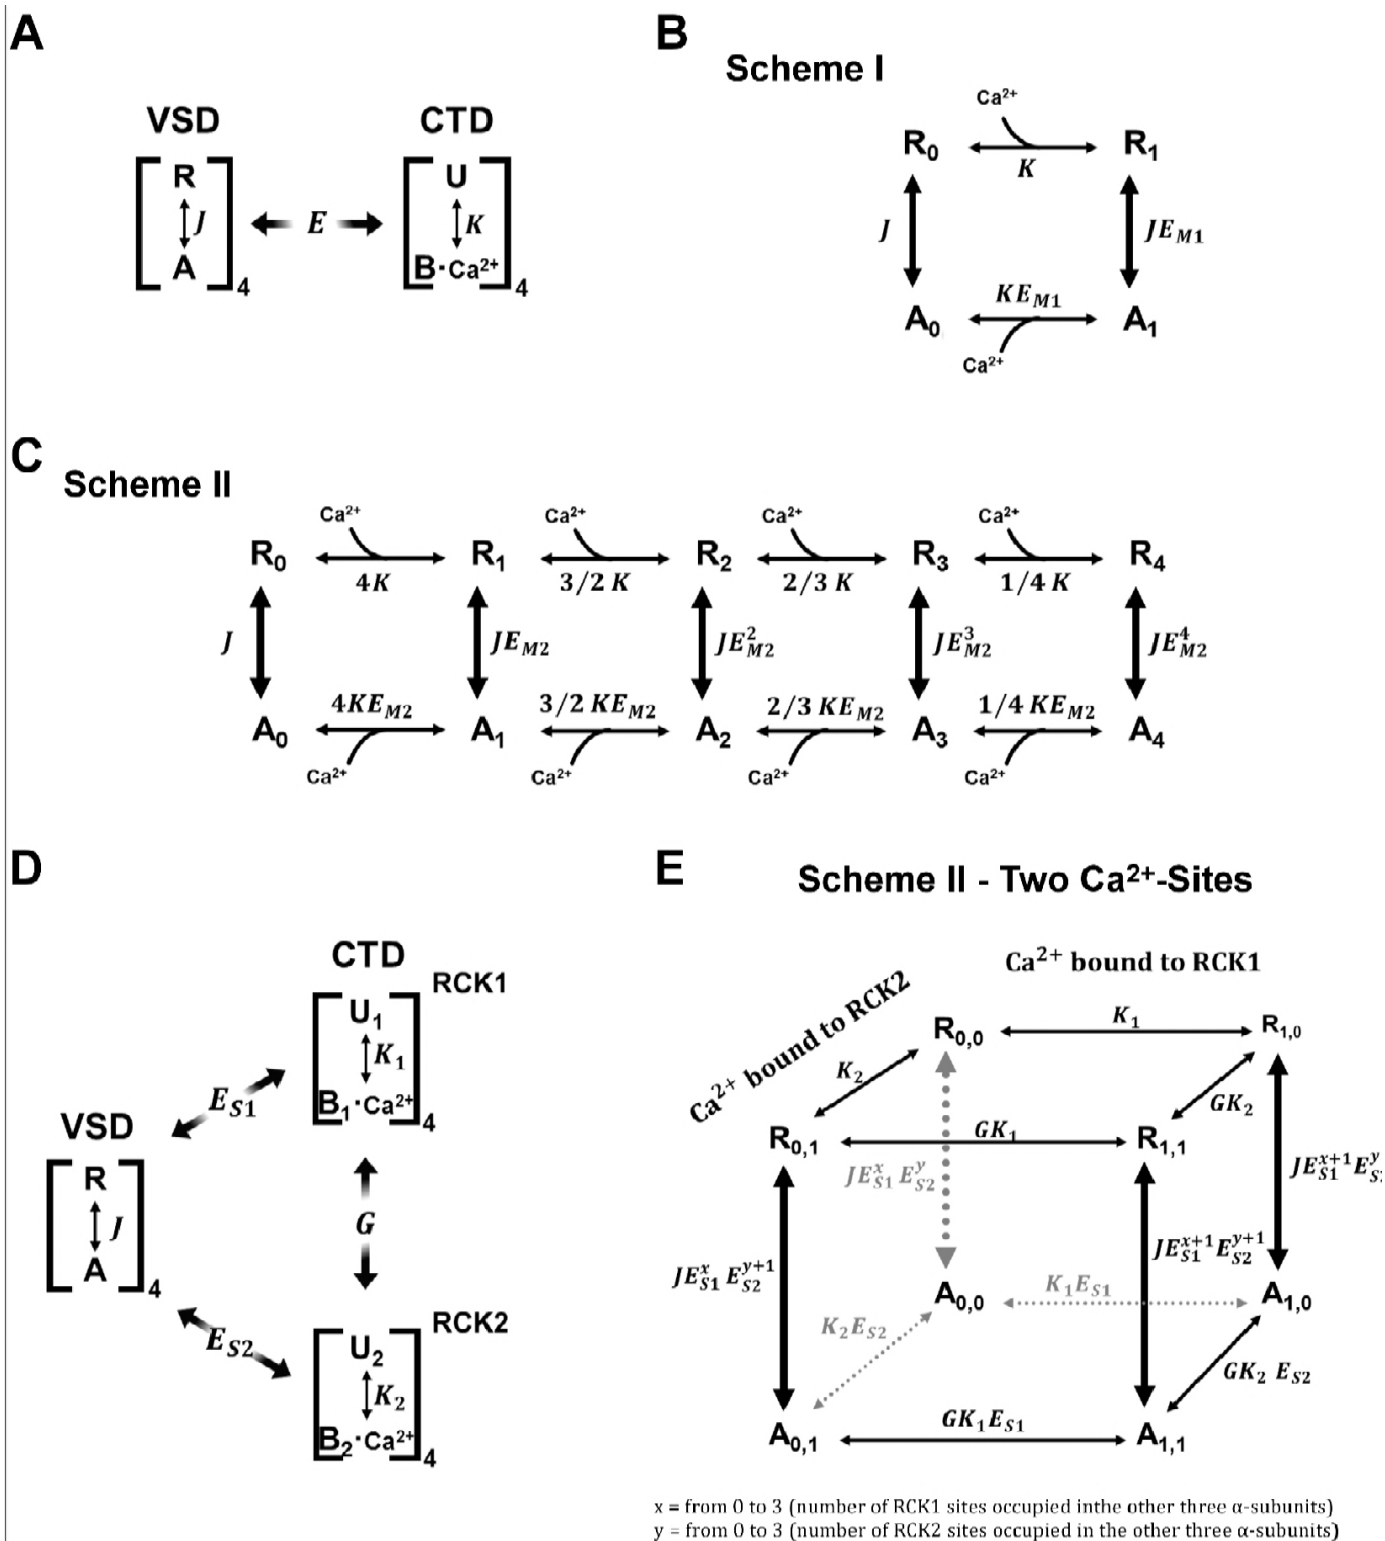

803

## 804 Legends Supplementary Figures

805 **Figure 1—figure supplement 1. Ca<sup>2+</sup> increase the slow component of the OFF gating**  
806 **currents. (A)** Gating current ( $I_G$ ) recordings evoked by 200 mV pulses with different  
807 durations (from 0.2 to 4 ms) at 0 and 10  $\mu\text{M}$   $[\text{Ca}^{2+}]$  conditions, respectively. **(B-C)** The top  
808 panels show the superimposed traces of the  $I_G$ -OFF recorded at -90 mV evidencing a  
809 decrease in amplitude and a slower decay of the OFF current as the duration of the pulse  
810 increases at 10  $\mu\text{M}$   $\text{Ca}^{2+}$ . The dashed line represents the baseline for each experiment.  $I_G$ -  
811 OFF were fitted with an exponential function of two-components (fast and slow  
812 components).  $I_G$ -OFF traces at 0.2 ms and 4 ms pulse duration are displayed for each  $\text{Ca}^{2+}$   
813 condition. Orange and blue lines correspond to fast and slow components of the two-  
814 exponential fits, respectively: **(B)** “zero”  $\text{Ca}^{2+}$  ( $\tau_F = 10 \mu\text{s}$  and  $\tau_S = 44 \mu\text{s}$ ) and **(C)** 10  $\mu\text{M}$   $\text{Ca}^{2+}$   
815 ( $\tau_F = 25 \mu\text{s}$  and  $\tau_S = 212 \mu\text{s}$ ). **(D-E)** The relative amplitude of the OFF-charge components,  
816 the fast ( $Q_F$ ) and slow ( $Q_S$ ) charge components were plotted against the pulse duration and  
817 fitted with an exponential function representing the time course of the opening of the  
818 channel: **(D)** “zero”  $\text{Ca}^{2+}$  ( $\tau_{0\text{Ca}^{2+}} = 1.8 \text{ ms}$ ) and **(E)** 10  $\mu\text{M}$   $\text{Ca}^{2+}$  ( $\tau_{10 \mu\text{M}} = 536 \mu\text{s}$ ).

819 **Figure 2—figure supplement 1. Kinetic models of the VSD activation according to the**  
820 **CTD-VSD interaction schemes. (A)** Sub-scheme describing calcium and voltage allosteric  
821 interaction for closed channels. The VSD transit between two resting (R) and active (A)  
822 configuration governed by the equilibrium constant  $J$ , whereas each  $\text{Ca}^{2+}$  site undergoes  
823 unbound (U) -  $\text{Ca}^{2+}$  bound (B) transitions governed by the equilibrium constant  $K$ . The  
824 allosteric factor  $E$  accounts for the coupling between the calcium and voltage sensors (CTD-  
825 VSD) **(B-C)** VSD kinetic models in presence of  $\text{Ca}^{2+}$  according to CTD-VSD interaction  
826 schemes I and II (**Figure 2A,B**), respectively, where the vertical transitions (R-A) represent



827 the VSD movement and the horizontal transitions (R-R and A-A) are  $\text{Ca}^{2+}$ -binding reactions  
828 when the VSD is in the resting or active conformation. For the Scheme I (**B**), each VSD can  
829 undergo  $R_0\text{-}A_0$  or  $R_1\text{-}A_1$  transitions depending on the unbound or bound state of the  $\text{Ca}^{2+}$  site  
830 in the  $\alpha$ -subunit, respectively. Thus, the  $R_1\text{-}A_1$  equilibrium is defined by  $J$  increased  $E_{M1}$ -fold  
831 ( $JE_{M1}$ ). For the Scheme II (**C**), the  $R_0\text{-}A_0$  to  $R_4\text{-}A_4$  transitions represent the VSD equilibrium  
832 with 0, 1, 2, 3, and 4 occupied  $\text{Ca}^{2+}$  sites in the channel. Thus, for each  $\text{Ca}^{2+}$  bound the  
833 equilibrium constant  $J$  increase  $E_{M2}$ -fold reaching to  $JE_{M2}^4$  when the four  $\text{Ca}^{2+}$  sites are  
834 occupied. The thickness of the arrows indicates the probability of transitions. (**D**) General  
835 sub-scheme of the CTD-VSD interaction including two  $\text{Ca}^{2+}$  sites for each CTD (RCK1 and  
836 RCK2 sites). For each RCK1 and RCK2 site the unbound- $\text{Ca}^{2+}$  bound transitions are  
837 governed by the equilibrium constants  $K_1$  and  $K_2$ . The factor  $G$  describe the cooperativity  
838 between the sites within the same  $\alpha$ -subunit; and the  $E_{S1}$  and  $E_{S2}$  factors define the  
839 allosteric coupling between the RCK1 and RCK2 sites and the VSD, respectively. (**E**)  
840 Schematic representation of VSD kinetic model according to the extended version of the  
841 Scheme II (**C**) accounting for both RCK1 and RCK2  $\text{Ca}^{2+}$ -sites on each  $\alpha$ -subunit. For sake  
842 of simplicity, are only depicted the VSD transitions depending on the unbound or bound state  
843 of the RCK sites within the same  $\alpha$ -subunit: RCK1 site ( $R_{1,0}\text{-}A_{1,0}$ ), RCK2 site ( $R_{0,1}\text{-}A_{0,1}$ ) and  
844 both sites ( $R_{1,1}\text{-}A_{1,1}$ ).
